1 **A field experiment to assess passage of juvenile salmonids across beaver dams during low**  
2 **flow conditions in a tributary to the Klamath River, California, USA.**

3

4 **Short Title: fish passage over beaver dams**

5

6 Michael Moritz Pollock<sup>1</sup>, Shari Witmore<sup>2</sup> and Erich Yokel<sup>3</sup>

7

8 <sup>1</sup> National Oceanic and Atmospheric Administration, Northwest Fisheries Science Center,  
9 Watershed Program, Seattle, Washington, United States of America

10 <sup>2</sup> National Oceanic and Atmospheric Administration, National Marine Fisheries Service, West  
11 Coast Region, Klamath Branch, Arcata, California, United States of America

12 <sup>3</sup> Scott River Watershed Council, Etna, California, United States of America

13

## 14 **ABSTRACT**

15 Across Eurasia and North America, beaver (*Castor* spp), their dams and their human-built  
16 analogues are becoming increasingly common restoration tools to facilitate recovery of streams  
17 and wetlands, providing a natural and cost-effective means of restoring dynamic fluvial  
18 ecosystems. Although the use of beaver ponds by numerous fish and wildlife species is well  
19 documented, debate continues as to the benefits of beaver dams, primarily because dams are  
20 perceived as barriers to the movement of fishes, particularly migratory species such as  
21 salmonids. In this study, through a series of field experiments, we tested the ability of juvenile  
22 salmonids to cross constructed beaver dams (aka beaver dam analogues). Two species, coho  
23 salmon (*Oncorhynchus kisutch*) and steelhead trout (*O. mykiss*), were tracked using passive  
24 integrated transponder tags (PIT tags) as they crossed constructed beaver dams. We found that  
25 when we tagged and moved late-summer parr from immediately upstream of the dams to  
26 immediately downstream of them, most of them were detected upstream within 36 hours of  
27 displacement. By the end of a 21-day field experiment, 91% of the displaced juvenile coho and  
28 54% of the juvenile steelhead trout were detected on antennas upstream of the dams while <1%  
29 of the coho and 15% of the steelhead trout were detected on antennas in the release pool below  
30 the dams. A similar but shorter 4-day pilot experiment with only steelhead trout produced similar  
31 results. In contrast, in a non-displacement experiment, juveniles of both species that were  
32 captured, tagged and released in a pool 50 m below the dams showed little inclination to move  
33 upstream. Finally by measuring hydraulic conditions at the major flowpaths over and around the

34 dams, we provide insight into conditions under which juvenile salmonids are able to cross these  
35 constructed beaver dams, which should help guide future restoration efforts.

## 36 INTRODUCTION

37 Human-constructed dams and other instream obstructions have become a ubiquitous feature  
38 across riverine landscapes and have altered many natural processes by reducing ecosystem  
39 connectivity. In the past five millennia, millions of dams have been constructed by humans, with  
40 over two million built in the USA alone [1, 2]. Currently, efforts are underway to remove many  
41 of these dams, with the primary objective of restoring stream connectivity, and more specifically,  
42 to improve fish passage [3, 4].

43 While the number of dams built by humans is impressive, there are actually fewer dams in  
44 North America now than prior to European colonization, albeit of a different size and materials.  
45 Historic estimates of North American beaver (*Castor canadensis*) populations range from 60-400  
46 million, suggesting that across their  $1.5 \times 10^7$  km<sup>2</sup> range, there was anywhere from 10-60 million  
47 beaver dams, mostly made of sticks and mud [5-7]. In addition, large wood formed millions of  
48 jams, dams and other obstructions that dammed and diverted sediment and water across streams,  
49 rivers and even entire valleys [8-10]. Historic accounts support the ubiquity of such biogenic  
50 dams. Walter and Merritts (2008) [11] in their comprehensive study of pre-European paleo-  
51 channels along mid-Atlantic seaboard of eastern North America, determined that many were so  
52 heavily impacted by beaver dams and vegetation, that there were few discernable channels. This  
53 description is consistent with the early depictions of valley bottoms as ubiquitous swampy

54 meadows and marshes. On the other side of the continent, the Willamette Valley (13,700 km<sup>2</sup>) in  
55 Oregon was described by some of the first Europeans to see it (e.g. beaver trappers) as full of  
56 wood jams and rafts that created ever shifting multiple channels and backwaters and extensive  
57 marshes across the valley, such that travel was limited to trails on edges [12]. Similarly, at our  
58 study site on the Scott River (area = 2.1x10<sup>3</sup> km<sup>2</sup>) a major tributary to the Klamath River in  
59 California, the valley floor was described by trappers as “all one swamp, caused by the beaver  
60 dams, and full of (beaver) huts” [13].

61 Through commercial trapping for furs, and government-sponsored desnagging, stream  
62 cleaning and wildlife control, humans have removed most of these biogenic dams, jams and  
63 other obstructions, and most of this occurred prior to the 20<sup>th</sup> century [10, 14]. Because many  
64 scientific disciplines related to the study of rivers such as ecology, geology, and fluvial  
65 geomorphology emerged in the late 19<sup>th</sup> and early 20<sup>th</sup> centuries, and subsequent to the  
66 widespread removal of these obstructions to flow and sediment transport, this has profoundly  
67 influenced the perception among scientists and natural resource managers as to what is the  
68 natural condition of fluvial ecosystems. In combination with the obvious detrimental ecological  
69 impacts of modern dams, especially high-head dams, this has led to the widespread and largely  
70 incorrect perception that the natural and ideal condition of all streams is “free-flowing” and clear  
71 of dams and other obstructions [2, 10, 15].

72 However, such biogenic, wood-based dams are fundamentally different from modern  
73 concrete and rock dams in that they are small (very low-head), semi-permeable and ephemeral.  
74 Beaver dams in particular are usually small, not exceeding 2 m in height (mostly < 1 m high),  
75 and are transitory landscape features, with dam lives typically ranging from a few years to

76 decades [14, 16-18]. Such dams have enormous beneficial ecosystem impacts, such as creating  
77 ponds, wetlands and other types of slow-water habitat, contributing to water storage and  
78 groundwater recharge across landscapes, altering sediment transport rates and stream  
79 morphology and changing the underlying geomorphic structure across entire valley floors [19-  
80 25].

81 Thus, throughout much of the northern hemisphere, beaver have been creating structurally  
82 complex and biologically diverse aquatic habitat for millions of years, and many anadromous  
83 and freshwater fishes have adapted to and evolved in such habitat [26, 27]. In addition to dams,  
84 beaver create complex habitat through the construction of lodges and caches made of wood from  
85 nearby trees that they fell, as well as the excavation of soil to build canals, channels, tunnels and  
86 burrows [5]. Such activities create an aquatic environment that is biologically, hydraulically,  
87 thermally and structurally diverse.

88 In North America, over 80 fishes are known to use beaver ponds, with 48 species commonly  
89 using them, inclusive of commercially, culturally and recreationally important species such as  
90 coho salmon (*Oncorhynchus kisutch*), steelhead trout (*O. mykiss*), Atlantic salmon (*Salmo salar*),  
91 cutthroat trout (*O. clarkii*) and brook trout (*Salvelinus fontinalis*) [6]. Many fishes utilize the  
92 structurally complex, deep, slow water and emergent wetlands created upstream of beaver dams  
93 [26, 28]. Beaver build dams typically ranging from 30-100 cm, but may be as high as 250 cm,  
94 and the height of such dams has raised concerns that they are barriers to fish passage, particularly  
95 for salmon and trout [28, 29]. In the United States, state and federal rules often require stream  
96 passage barriers to be no more than 15-20 cm in height, making most natural beaver dams non-  
97 conforming to existing guidelines [30, 31]. There are also concerns about steep stream gradients

98 as fish passage barriers, and typically when constructing passage routes over barriers such as  
99 dams, a series of step-pools is created rather than a steep stream bed. Such rules are in place to  
100 ensure that human-built structures such as culverts, hydroelectric, water storage and diversion  
101 dams do not obstruct the natural movement of fishes. Globally, the rapid increase in large dam  
102 construction highlights the need to understand migratory behavior and passage needs for many  
103 fishes [28], and much effort has gone into designing and carefully engineering constructed  
104 fishways that ideally allow for fish passage over such structures [31].

105 At the same time, in Europe and North America natural resource policy guidance documents  
106 intended to facilitate recovery of fish and wildlife populations stress the need for more channel-  
107 spanning instream restoration structures such as beaver dam analogues (BDAs), log steps,  
108 boulder weirs, log jams and natural beaver dams, to create dynamic, structurally complex and  
109 spatially diverse aquatic, riparian and wetland habitat [32-37].

110 Fish passage rules designed for large dams, culverts and other obstructions are typically  
111 applied to restoration structures, even though their scale, purpose and function is quite different.  
112 In particular, restoration structures designed to be analogous to beaver dams (BDAs) in both  
113 form and function, are becoming an increasingly popular stream restoration technique [38-44].

114 In this study, we take advantage of a naturalistic situation to assess how salmonid species  
115 navigate past a beaver dam analogue constructed as part of a restoration project to help recover  
116 the Endangered Species Act (ESA)-listed Southern Oregon-Northern California Coast population  
117 of coho salmon [45]. The primary objective of this study was to evaluate whether juvenile coho  
118 salmon and steelhead trout can pass over beaver dam analogues and if so, identify a preferred  
119 flow path, e.g., do they prefer to jump over or swim around the BDAs?

120 Our second objective was to provide a basis for making a comparison between the number  
121 of fish that benefited from the habitat created upstream of the BDA and the number that may  
122 have been prevented from moving upstream because of the BDA. We hypothesized that because  
123 these salmonids have evolved in the presence of beaver dams for millions of years, that they  
124 have also evolved strategies for crossing them, and that by constructing dams similar to beaver  
125 dams in terms of size, location and materials, these fishes would also be able to cross these  
126 human-built structures. The results of this study are intended to guide future design  
127 considerations for fish passage at stream restoration structures.

## 128 **SITE DESCRIPTION**

129 The study took place in northern California on Sugar Creek, a tributary to the Scott River,  
130 which is itself a major tributary to the Klamath River (Fig 1). The Scott River watershed (HUC  
131 #18010208) encompasses 2,105 km<sup>2</sup> and is located in the Klamath and Marble Mountains of  
132 Western Siskiyou County in Northwest California (Fig 1).

133

### 134 **Fig 1. Site Map of the Scott River, a tributary to the Klamath River, California, USA.**

135 Black lines indicate the current extent of coho salmon in California. Inset shows the topography  
136 of the Scott River watershed in greater and the location of Sugar Creek in the upper watershed.  
137 California is located on the western coast of the United States of America, north of Mexico and  
138 south of the state of Oregon.

139

140       When European trappers first arrived in the 1830s, the valley floor of the Scott River was so  
141 full of beaver dams and lodges that it was in essence one large swamp [13]. Because of this  
142 abundance, it was initially called the Beaver Valley, and trappers rapidly removed thousands of  
143 beavers [13, 46]. Today a small number of beaver persist in the watershed in a few streams,  
144 including Sugar Creek. The area also has a history of extensive gold mining and the study reach  
145 on Sugar Creek is in an area that has been dredged for gold as recently as the mid-twentieth  
146 century, and currently flows through large mounds of cobble-dominated mine tailings.

147       The bedrock in the area, dating from pre-Silurian to Late Jurassic and possibly Early  
148 Cretaceous time, consists of consolidated rocks whose fractures yield water to springs at the  
149 valley margins and in the surrounding upland areas [47]. The valley alluvial fill consists of a few  
150 isolated patches of older alluvium (Pleistocene) found along the valley margins and of younger  
151 alluvium which includes stream-channel, floodplain, and alluvial-fan deposits of recent age [47].  
152 Recent alluvial deposits reach a maximum of more than 120 m thick in the wide central part of  
153 the valley. The average seasonal precipitation is 805 mm but may exceed 1780 mm annually in  
154 the western mountains, and exceed 760 mm in the eastern mountains. The average annual  
155 temperature in the valley is 10.2 °C. Streamflow in the Scott River is primarily driven by annual  
156 fluctuations in snowpack and the quality of the water year. Most of the watershed is forested  
157 with conifers, predominantly Ponderosa pine (*Pinus ponderosa*) and Douglas-fir (*Pseudotsuga*  
158 *menziesii*), transitioning into oak (*Quercus* spp) savannah on the lower foothills, and then to  
159 pasture and irrigated fields on the main valley floor, with cottonwood (*Populus trichocarpa*) and  
160 willow (*Salix* spp) lining the major streams in narrow bands between the channel and the  
161 frequently rip-rapped banks.



162 The winter of water year 2015 (October 1, 2014-September 30 2015) was the warmest in  
163 California's recorded history, causing most of the precipitation to fall as rain, and was the fourth  
164 consecutive year of drought (as defined by the U.S. Drought Monitor) in the Scott River  
165 watershed. With the exception of water year 2017, the drying trend has continued, and water year  
166 2018 is the seventh year of drought or abnormally dry conditions in the Scott River watershed in  
167 the past eight years (US Drought Monitor at <http://droughtmonitor.unl.edu>).

## 168 **METHODS**

169 As part of an experimental stream restoration project intended to improve habitat for ESA-  
170 listed coho salmon, in 2015 we constructed two BDAs on Sugar Creek approximately 50 m and  
171 200 m above its confluence with the Scott River, following the methods as described in [40, 48].  
172 Such structures are intended to mimic the form and function of beaver dams, and under ideal  
173 conditions, they are eventually colonized by beaver. The structures were made by pounding a  
174 line of posts into the ground, approximately perpendicular to the direction of flow, then weaving  
175 willow between the posts. A downstream apron of cobbles was provided to minimize scour and  
176 an upstream berm of clay, organic material, sand and rock was constructed to create a semi-  
177 permeable structure with flow moving through, over and around the structure during most of the  
178 year, but with some side channel and side passage flow diminishing in the summer when flows  
179 decrease due to both natural causes and upstream water diversions. Although juvenile fish could  
180 likely wiggle through some of the pores within the structure, most of the flow was either over or

181 around the structure and we thought that most fish would follow one of these major flow paths to  
182 cross the structures.

183 The lower BDA was constructed at the same location and height (approximately 1 m) as a  
184 naturally occurring beaver dam that had existed there a few years previous, and has a total linear  
185 width of 45 m. The upper BDA was constructed in a relatively constricted reach between piles of  
186 mine tailing cobbles. The crest elevation is approximately 30 cm above the downstream pool  
187 created by the lower BDA, and the total width is 15 m. In the summer of 2017, two smaller  
188 BDAs were constructed downstream of the lower BDA to provide additional stability of the  
189 structure and to address perceptions that the 1 m-high structure was a barrier to fish passage. As  
190 of summer, 2017, the BDAs have created approximately 7100 m<sup>2</sup> of slow water habitat and  
191 wetlands, and are actively being colonized by a family of beavers. Coho salmon spawn in Sugar  
192 Creek above the BDAs, and the ponds support juvenile coho salmon and steelhead trout  
193 throughout the year.

## 194 **Experimental Captures and Releases**

195 To assess the ability of juvenile salmonids to pass over the dams, we performed a series of  
196 three experiments in 2016 and 2017 by tagging and then displacing fishes from above to below a  
197 dam or dams, or by tagging fishes below dams and then monitoring to see if they moved  
198 upstream.

### 199 **Experiment 1**

200 During the summer and early fall of 2016, We tagged 758 juvenile coho salmon and 169  
201 juvenile steelhead trout in the Sugar Creek beaver ponds with 12 mm full duplex Passive

202 Integrated Transponder (PIT ) tags that resonate at 134.2 kHz (Biomark, Inc.) as part of a larger  
203 study to estimate the population size, seasonal survival and movement of these juveniles.  
204 Minimum allowable size of taggable salmonids was 65 mm, and almost all tagged fish were  
205 between 65-80 mm in length. As a pilot study to assess whether juvenile salmonids could cross  
206 BDAs, on September 30, 2016, we captured and tagged 32 juvenile *O. mykiss* and placed them in  
207 the pool below the single BDA that was installed at that time (Fig 2). The following day we  
208 captured and tagged another 16 *O. mykiss* juveniles and released them in the same pool. Below  
209 the release pool we placed a block net to minimize downstream movement. A series of  
210 temporary, 60 cm by 60 cm square portable PIT antennas attached to a Biomark RM301 reader  
211 board with a multiplexor that “sampled” each antenna for 100 mS every 900 mS, were placed in  
212 the release pool, just above the BDA in the pond, and downstream of the block net, to monitor  
213 the movement of tagged fish and maximize the potential for detecting any fish that moved  
214 upstream past the BDA and into the upstream Pond (Fig 2). Our arrays were not set up to detect  
215 fish that passed the dam by wiggling through the diffuse flow within the pores of the structure.  
216 PIT antenna were set up so that they covered approximately 90% of the total side channel area  
217 through which the fish could pass, and included the thalweg, which we assumed to be the most  
218 commonly used passage route.

219

220 **Fig 2. Planview of fish passage experimental setups in 2016 and 2017.**

221 The short red lines around BDAs indicate temporary PIT antennas, the long red lines indicate  
222 permanent PIT antennas; SC = side channel; RP = Release Pool, where tagged fish were  
223 released; BDA = Beaver Dam Analogue. Major flow paths are shown with blue arrows, though

224 many minor flow paths exist throughout and between the BDAs. Blue shaded areas are places of  
225 BDA-influenced inundation.

226

227 There were numerous flow paths over, through and around the BDA, but the major flow path  
228 was a side channel that skirted the edge of the BDA on river left, with a discharge of  
229 approximately 0.03 m<sup>3</sup>/s (about 1 cubic foot per second) or about half the total estimated  
230 discharge measured at a gage station approximately 1 km upstream (CA Dept. of Water  
231 Resources gage #F25890) at the time of the study (Fig 3). The side channel flowed over cobble  
232 and gravel for a distance of 8.3 m at a 10% slope, until it entered the pool immediately below the  
233 BDA.

234

235 **Fig 3. Hydrograph of Sugar Creek during the period of study.**

236 Coho outmigration occurs from March through May and is typically centered around peak flow  
237 events. Vertical arrows indicate when mark and release experiments to test for passage across  
238 BDAs occurred, which were all during low flow periods at the end of September-early October,  
239 2016, late October-early November, 2017, and July, August and September, 2017.

## 240 **Experiment 2**

241 During the summer and fall of 2017, we tagged 1,078 juvenile coho and 363 juvenile  
242 steelhead trout in the Sugar Creek beaver ponds with 12 mm full duplex PIT tags. We also  
243 opportunistically tagged 16 juvenile Chinook salmon. By this time, two additional BDAs had  
244 been installed just below the original BDA to create a series of 3 pools intended to ease fish  
245 passage (Fig 2). The original BDA was labeled BDA 1.0 and the middle and downstream most

246 BDAs were labeled BDA 1.1 and BDA 1.2, respectively. To assess whether juvenile salmonids  
247 could cross BDAs, on October 24, we captured and tagged 154 juvenile *O. kisutch* and 39  
248 juvenile *O. mykiss* and placed them in the pool below BDA #1.1 (Fig 2-bottom). Similar to  
249 Experiment #1, the portable PIT antennas were placed in the release pool, just above the upper  
250 BDA in the pond, and downstream of the block net (Fig 4). Flow during the experimental period  
251 is shown in Fig 3.

252 **Fig 4. Experimental layout of the PIT antennas to detect fish passage across BDAs.**

253 Layout of temporary antennas and block net in fall 2017 to monitor the movement of juvenile  
254 coho salmon and steelhead trout PIT-tagged and placed in the release pool below BDA 1.1. Drop  
255 over BDA 1.0 = 27 cm, drop over BDA 1.1 = 40 cm. Antennas A-09, A-06 and A-08 monitored  
256 the three primary jump routes on BDA 1.1, while Antenna A-00 monitored the single primary  
257 jump route available on BDA 1.0. Antenna A-05 monitored fish in the release pool, and Antenna  
258 A-03 was one of 3 antennas that monitored fish passage on the side channels (the other two are  
259 not pictured). Antenna A-90 and Antenna A-100 are approximately 30 and 40 m upstream of  
260 BDA 1.0, respectively. Just out of the picture on the right are antennas on side channels. Also  
261 not in view is another antenna below the block net, to detect for any downstream movement past  
262 the block net. Note the recently beaver-felled cottonwood (golden leaves) in upper left of  
263 photograph.

264 This arrangement allowed the monitoring of fish use of the release pool, four jumping routes  
265 and three side channel passage routes as well as any fish that made it into the lower large BDA

266 pond or other parts of the restoration complex. We were not able to provide complete antenna  
267 coverage of all of the lesser flow paths and some fish may have passed undetected by wiggling  
268 through the pores of the BDAs. The temporary antennas were operational for approximately  
269 three weeks, from October 24 through November 11, at which point, few fish were detected in  
270 either the release pool or the passage routes and the threat of winter storms required removal of  
271 the small portable antennas. The larger permanent antennas upstream of the lower BDA (A-90  
272 and A-100) collect data year-round. In 2017, for each major flowpath over or around a BDA, a  
273 longitudinal profile of bed and water surface elevation was mapped using a Trimble R8 Model 3  
274 connected to Real-Time Kinematic Global Navigation Satellite System (RTK-GNSS). Velocities  
275 were measured at discrete points along the profile and at cross sections to approximate discharge  
276 for each of the flow paths, using a SonTek Flowtracker Handheld 2D ADV. Total stream  
277 discharge was measured at a California Department of Water Resources monitoring station on  
278 Sugar Creek, approximately 700 m upstream from the upper BDA (data available at  
279 <https://cdec.water.ca.gov/>).

280         There were numerous flow paths over, through and around the BDAs. On BDA 1.1 (the  
281 lower BDA that displaced fish had to cross) major flow paths were a side channel that skirted the  
282 edge of the BDA on river left, with a discharge of approximately 0.03 m<sup>3</sup>/s, and three sections  
283 across the top of the BDA, each with a similar amount of discharge, where water flowed over the  
284 top to form waterfalls (Fig 4). The side channel flowed for 8 m over cobble and gravel at a slope  
285 of 11%, and entered into the pool below BDA 1.1 (i.e., the “Release Pool”, where displaced fish  
286 were released). The water surface elevation-to-water surface elevation drop at the falls flowing  
287 over the BDA ranged from 38-40 cm.

288 Major flow paths on BDA 1.0 (the upper BDA that fish displaced fish had to cross) were  
289 a side channel that flowed on the river left side of the main BDA section and a single section  
290 near the middle where water flowed over the top of the BDA. Flow out of BDA 1.0 was much  
291 more dispersed, flowed through dense vegetation, and there were numerous passage routes where  
292 we were unable to place PIT antennas (Fig 2). The side channel passage route that we were able  
293 to monitor flowed over cobble and gravel for a distance of 5 m at an 8% slope, until at the  
294 downstream end it entered the pool immediately above BDA 1.1. The water surface elevation-to-  
295 water surface elevation drop at the waterfall over BDA 1.0 was 27 cm.

296 In addition to the temporary portable antennas, we also placed two permanent antennas  
297 (A-90 and A-100) in BDA Pond 1 to monitor diurnal and seasonal movement of tagged fish (Fig  
298 4). These antennas were large (6m x 1m) with each attached to a single Biomark IS1001 reader  
299 board. These antennas enabled us to detect fish that may have moved upstream after the initial  
300 study period was finished.

### 301 **Experiment 3**

302 During the summer and fall of 2017, we captured and tagged juvenile salmonids in the reach  
303 below the BDAs, at the confluence of Sugar Creek with a major side channel of the Scott River  
304 (Fig 2). We opportunistically captured and tagged juvenile salmonids on July 25 August 18 and  
305 September 19, 2017, for a total of 61 coho salmon, 126 steelhead trout and 12 Chinook salmon  
306 tagged during the three events (Experiments 3,4 and 5, respectively). Flow during those periods  
307 is noted in Fig 3. The purpose of this series of experiments was to assess whether fishes naturally

308 summer-rearing in the relatively shallow pool-riffle environment below the BDAs moved past  
309 them and into the pond habitat above the BDAs.

310 Early fall population estimates upstream of the BDAs were made through a mark-recapture  
311 effort on 10/24-10/25/17. Populations of juvenile coho salmon and steelhead trout were  
312 estimated using the Lincoln-Petersen mark-recapture method (Chapman 1951). Juvenile coho  
313 salmon habitat capacity upstream of the BDAs was estimated using the method of Goodman et  
314 al. (2010) (see also Beechie et al. 2015). This method requires measuring the habitat parameters  
315 of velocity, depth and proximity to cover and then weighting their value to juvenile coho salmon  
316 based on the value of these parameters. We subsampled the habitat for these three metrics along  
317 six cross sections within the treated area at approximately equal intervals, then weighted for area  
318 based on the actual distance from the mid-points between cross-sections.

## 319 **RESULTS**

### 320 **Experimental Capture and Releases**

321

#### 322 **Experiment 1**

323 This initial pilot experiment in 2016 showed that 43 of the 58 juvenile steelhead trout that  
324 were placed in the release pool were detected upstream of the single BDA (#1.0) within 3 days  
325 of release, and just a few individuals remained in the release pool 4 days after release (Fig 5).  
326 Most of the upstream movement occurred in the hours after sunset, from around 7 pm through  
327 midnight, with a smaller pulse near sunrise (Fig 6). There was little upstream movement during  
328 the daylight hours, with just 5 of 58 fish moving upstream between sunrise and sunset. Three fish



329 exploited small openings in the block net and moved downstream. We also detected three tagged  
330 fish that were not part of the experimental displacement release below the BDA, suggesting  
331 volitional movement. Additionally, over the course of the 4-day experiment, several tagged fish  
332 moved upstream past the BDA, then back downstream and then back upstream again. One fish  
333 moved downstream below the block net, then back into the release pool, then upstream above the  
334 BDA.

335

336 **Fig 5. Daily PIT antenna detections of juvenile steelhead trout above and below BDA in**  
337 **2016.**

338 The 2016 experimental release of juvenile steelhead trout below BDA 1 on two consecutive days  
339 showing the daily number of detections of individual steelhead trout for each release group in the  
340 release pool below BDA 1, in the Pond above BDA 1, and below the block net at the lower end  
341 of the release pool. Thirty two fish were released in the first cohort on 9/30/16 and 16 more in  
342 the second cohort on 10/1/16, for a total of 58 fish released. Day 1 refers to the day of release for  
343 each cohort, Day 2, the day after release, etc.

344

345 **Fig 6. The hourly timing of movement of juvenile steelhead trout across the BDA in 2016.**

346 The 2016 experimental release, showing the hourly timing of tagged juvenile steelhead trout  
347 detected moving past BDA 1 during the 4-day experiment (n = 38). Most of the fish moved  
348 during the late evening, after sunset (sunrise = 07:08 and sunset = 18:55 on 9/30/16).

349

350 **Experiment 2**

351 The majority (139 out of 155) of the tagged juvenile coho salmon that were placed in the  
352 release pool below BDA 1.1 left the pool within 36 hours of being released (Fig 7). The fish  
353 were released around 2 pm on October 25th, and by evening of the 26<sup>th</sup>, just 17 of 156 coho  
354 remained in the released pool, and a day later, just six remained. By November 8<sup>th</sup>, at the end of  
355 the experimental period, no coho salmon remained in the release pool. Overall, Ninety one  
356 percent (141/155) of the fish were eventually detected in BDA Pond 1. Twenty two of the 38  
357 juvenile steelhead trout also moved up into the beaver pond after release, but not as rapidly as the  
358 coho (Fig 8). Seven of 38 steelhead were detected in the release pool 60 hours after release, and  
359 between five to nine steelhead trout were detected on a daily basis in the release pool throughout  
360 the rest of the experimental study period (through November 8<sup>th</sup>). Five of these fish were later  
361 detected by one of the permanent antennas in the BDA pond upstream sometime between  
362 November 9<sup>th</sup> 2017, and April 1, 2018, indicating that they had crossed the BDAs.

363

364 **Fig 7. Daily PIT antenna detections of juvenile coho salmon above and below BDAs in**  
365 **2017.**

366 Daily detections in 2017 of the number of individual juvenile coho salmon  
367 in the release pool, jumping a BDA, using a side channel passage and in BDA Pond1, and above  
368 both BDAs (coho n=155). No individuals were detected below the block net on the downstream  
369 end of the release pool.

370 **Fig 8. Daily PIT antenna detections of juvenile steelhead trout above and below BDAs in**  
371 **2017.**

372 Daily detections in 2017 of the number of individual steelhead trout in the release pool below  
373 BDA 1.1, jumping a BDA, using a side channel passage and in BDA Pond1, and above both  
374 BDAs (steelhead n = 39). No individuals were detected below the block net on the downstream  
375 end of the release pool.

376

377 Table 1 details the movement patterns, and flow path preferences of juvenile coho salmon  
378 and steelhead trout after they were released into the pool below BDA 1.1. The detection  
379 efficiency of the antenna network was quite good. During the initial study period, all (100%) of  
380 the tagged fish were detected at least once, somewhere in the antenna network: 93% were  
381 detected in the release pool, 94% were detected upstream of the first BDA (BDA 1.1), and 81%  
382 detected upstream of the second BDA (BDA 1.0). For juvenile coho salmon, 97% were detected  
383 upstream of the first BDA (BDA 1.1), and 89% detected upstream of the second BDA (BDA  
384 1.0). Overall, the juvenile coho salmon had higher detection rates on the upstream PIT antenna  
385 network than the steelhead trout (89% v. 50% detection rates, respectively). No fish were  
386 detected on the antenna placed below the stop net to detect any potential downstream escapees.  
387

388 **Table 1. Summary of detection and movement of 196 juvenile coho salmon and steelhead**  
389 **trout (Stlhd) released below two beaver dam analogues in October, 2017.**

|        | Coho- | Coho- | Stlhd- | Stlhd- | Total- | Total- |
|--------|-------|-------|--------|--------|--------|--------|
| Metric | N     | (%)   | N      | (%)    | N      | (%)    |

---

|                                   |     |      |    |      |     |      |
|-----------------------------------|-----|------|----|------|-----|------|
| Released                          | 155 | 100% | 39 | 100% | 196 | 100% |
| Detected after release            | 155 | 100% | 39 | 100% | 196 | 100% |
| Detected in release pool          | 143 | 92%  | 39 | 100% | 182 | 93%  |
| Detected upstream of release pool | 152 | 97%  | 32 | 80%  | 184 | 94%  |
| Detected in BDA Pond 1            | 139 | 89%  | 20 | 50%  | 159 | 81%  |
| Detected moving downstream        | 0   | 0%   | 0  | 0%   | 0   | 0%   |
| <u>BDA Passage Routes</u>         |     |      |    |      |     |      |
| Detected using a side channel     | 93  | 60%  | 25 | 63%  | 118 | 60%  |
| Detected jumping                  | 77  | 49%  | 17 | 43%  | 94  | 48%  |
| <u>BDA-1.1 Passage Routes</u>     |     |      |    |      |     |      |
| BDA1.1 Left Jump                  | 66  | 42%  | 11 | 28%  | 77  | 39%  |
| BDA1.1 Middle Jump                | 8   | 5%   | 13 | 33%  | 21  | 11%  |
| BDA1.1 Right Jump                 | 3   | 2%   | 4  | 10%  | 7   | 4%   |
| All BDA1.1 Jump Passage           | 74  | 47%  | 17 | 43%  | 91  | 46%  |
| BDA1.1 Side Channel Passage       | 61  | 39%  | 22 | 55%  | 83  | 42%  |
| <hr/>                             |     |      |    |      |     |      |
| Total moving past BDA 1.1         | 129 | 83%  | 31 | 78%  | 160 | 82%  |

BDA 1.0- Passage Routes

|                           |    |     |    |     |    |     |
|---------------------------|----|-----|----|-----|----|-----|
| BDA 1.0 Jump              | 24 | 15% | 0  | 0%  | 24 | 12% |
| BDA 1.0 small SC Passage  | 9  | 6%  | 4  | 10% | 13 | 7%  |
| BDA 1.0 main SC Passage   | 57 | 37% | 14 | 35% | 71 | 36% |
| All BDA 1.0 SC passage    | 63 | 40% | 15 | 38% | 78 | 40% |
| <hr/>                     |    |     |    |     |    |     |
| Total moving past BDA 1.0 | 83 | 53% | 15 | 38% | 98 | 50% |

390

391

392         Sixty percent of the fish used at least one side channel passage to cross a BDA, but many fish  
393 chose to jump over at least one of the BDAs (49% for coho, 43% for steelhead), the jump heights  
394 of which were 38-40 cm and 27 cm for BDAs 1.1 and 1.0, respectively (Fig 9). The lower BDA  
395 (1.1) had three passageways for jumping and of the fish that jumped, there was a strong  
396 preference for the river left jump route, for reasons that are not entirely clear. Measurements of  
397 velocity profiles and jump heights suggest that the middle and left routes were similar (Fig 9).  
398 However 39% of all fish passing BDA 1.1 used the left jump route, while just 11% used the  
399 middle jump route and just 4% used the right jump route (the remainder used the side channel).  
400 The preferred route did have the deepest downstream pool (58 cm), while the right route, which  
401 was the least preferred, was in a shallower part of the release pool (23 cm), while the middle  
402 jump route had a pool depth of 37 cm. Discharge through the three falls on BDA 1.1 were  
403 approximately equal. Overall, 74/156 juvenile coho and 17/40 juvenile steelhead were detected  
404 making a 38-40 cm jump over the lower dam.

405         There were notable behavioral differences between coho and steelhead in term of the timing  
406 of passage and the mode of passage. Of the fish that jumped to cross a barrier, most of the coho  
407 jumped between sunrise and sunset, with most of the jumping occurring in the afternoon, while  
408 most of the steelhead jumped between sunset and sunrise, with a spike in activity in the hours  
409 before sunrise (Fig 10). In contrast, individuals of both species that used the side channel for  
410 passage crossed at all hours of the day and night, with spikes in activity for both species at  
411 sunrise and the hours after sunset (Fig 11).

412

413 **Fig 10. The hourly timing of juvenile salmonids jumping over BDAs in 2017.**

414 Hourly timing of jumping over BDAs by juvenile coho salmon (*O. kisutch*) and steelhead trout  
415 (*O. mykiss*) in 2017, as a percentage of tagged fish (coho n=155; steelhead n = 39). The data  
416 suggest that coho prefer to jump during the day, while the majority of steelhead jumping occurs  
417 at night. Sunrise = 07:34 and sunset = 18:17 on October 24<sup>th</sup>, 2017.

418

419 **Fig 11. Hourly timing of side channel usage by juvenile salmonid to pass the BDAs in 2017.**

420 Hourly timing of side channel passage of juvenile coho salmon (*O. kisutch*) and steelhead  
421 trout (*O. mykiss*) across BDAs in 2017, as a percentage of tagged fish (coho n=155; steelhead n =  
422 39). In contrast to jumping, coho appear to prefer side channel passage at night, while the  
423 steelhead show no particular preference between day and night. Sunrise = 07:34 and sunset =  
424 18:17 on October 24<sup>th</sup>, 2017.

425

426 **Experiment 3**

427 In contrast to the Experiment 2 fishes that were captured in the BDA Pond and then released  
428 below BDA 1.1, the fishes captured and released below in the confluence pool in the Scott River  
429 (below BDAs 1.0-1.2-see Fig 2) in July, August and September, 2017, showed little evidence of  
430 upstream movement above any of the BDAs (Table 2). Only 11 of 61 juvenile coho salmon, 1 of  
431 126 tagged juvenile steelhead trout, and none of the 12 tagged juvenile Chinook salmon were  
432 detected upstream of the BDAs through May 31st, 2018. Overall, in total for these three  
433 experiments, 187/199 (94%) of the fish tagged in the Scott River, at the confluence with Sugar  
434 Creek, were never detected anywhere in the Sugar Creek PIT antenna network.

435 **Table 2. Summary of 3 experimental releases of tagged juvenile steelhead trout and coho**  
 436 **and Chinook salmon below Beaver Dam Analogues in 2016 and 2017. The data are**  
 437 **summarized as both the number and percentage of a species detected or not detected above**  
 438 **and below BDA 1.0. See Fig 2 for spatial configuration of the release site relative to BDAs.**  
 439

| Species                                                                                        | Total Released | Detected Below BDA1 | Detected Above BDA1 | Not Detected Above or Below BDA1 |
|------------------------------------------------------------------------------------------------|----------------|---------------------|---------------------|----------------------------------|
| <u>Expt-1, Sept. 2016: Capture in BDAP1, release in pool below BDA 1 w/dwnstrm block net</u>   |                |                     |                     |                                  |
| <i>O. mykiss</i>                                                                               | 58 (100%)      | 58 (100%)           | 52 (90%)            | 0 (0%)                           |
| <u>Expt-2, Oct., 2017: Capture in BDAP1, release in pool below BDA 1.1 w/dwnstrm block net</u> |                |                     |                     |                                  |
| <i>O. kisutch</i>                                                                              | 155 (100%)     | 152 (98%)           | 141 (91%)           | 0 (0%)                           |
| <i>O. mykiss</i>                                                                               | 39 (100%)      | 39 (100%)           | 22 (56%)            | 0 (0%)                           |
| <u>Expt-3, July, 2017: Capture and release in Scott-Sugar confluence pool, no block net</u>    |                |                     |                     |                                  |
| <i>O. kisutch</i>                                                                              | 12 (100%)      | 1 (8%)              | 4 (33%)             | 7 (58%)                          |
| <i>O. mykiss</i>                                                                               | 1 (100%)       | 0 (0%)              | 0 (0%)              | 1 (100%)                         |
| <i>O. tshawytscha</i>                                                                          | 1 (100%)       | 0 (0%)              | 0 (0%)              | 1 (100%)                         |
| <u>Expt-3 Aug., 2017: Capture and release in Scott-Sugar confluence pool, no block net</u>     |                |                     |                     |                                  |
| <i>O. kisutch</i>                                                                              | 6 (100%)       | 3 (50%)             | 1 (17%)             | 3 (50%)                          |
| <i>O. mykiss</i>                                                                               | 15 (100%)      | 3 (20%)             | 0 (0%)              | 12 (80%)                         |
| <i>O. tshawytscha</i>                                                                          | 5 (100%)       | 0 (0%)              | 0 (0%)              | 5 (100%)                         |
| <u>Expt-3, Sept., 2017: Capture and release in Scott-Sugar confluence pool, no block net</u>   |                |                     |                     |                                  |
| <i>O. kisutch</i>                                                                              | 43 (100%)      | 19 (44%)            | 6 (14%)             | 22 (51%)                         |
| <i>O. mykiss</i>                                                                               | 110 (100%)     | 13 (12%)            | 1 (%)               | 96 (87%)                         |
| <i>O. tshawytscha</i>                                                                          | 6 (100%)       | 0 (0%)              | 0 (0%)              | 6 (100%)                         |

440  
 441



442

## 443 **Population and habitat capacity estimates**

444 As of fall, 2017, we estimated that the amount of habitat created upstream of the BDAs was  
445 7,080 m<sup>2</sup> and of a quality sufficient to support 6,744 (SE=537) coho parr. From our fall, 2017  
446 mark-recapture effort, we estimated a population of 2,517 (SE=1173) coho parr. We also  
447 estimated the coho survival from summer, 2017 through the 2018 spring outmigration to be 88%.  
448 This is based on detection of 863 tagged coho during the spring outmigration period, out of 1077  
449 tagged the previous summer and fall (80.1%), multiplied by an estimated combined PIT antenna  
450 detection efficiency of 91% for juvenile coho salmon for the two antennas in the lower BDA  
451 pond during the spring outmigration period. We did not estimate steelhead abundance because of  
452 the relatively low densities observed, but we tagged 361 juveniles in the summer and fall and  
453 detected 152 during the spring outmigration period (42%), which multiplied by an 88% antenna  
454 detection efficiency (for juvenile steelhead trout) provides an overwintering “apparent” survival  
455 estimate of 48%.

## 456 **DISCUSSION**

457 This study lends support to the hypothesis that because salmonids have evolved with  
458 beaver dams, they have developed behavioral and physical adaptations that allow them to cross  
459 such dams at important life-history stages. The two relocation experiments suggest that both  
460 coho salmon and steelhead trout parr have little difficulty crossing the BDAs, whether by  
461 jumping over a 40-cm waterfall or swimming up a short side channel with an 8-11% slope, the

462 former being somewhat analogous to an engineered pool-weir passage structure and the latter  
463 being somewhat analogous to an engineered embedded rock ramp [49]. The fish appeared to  
464 time their movements according to light conditions and the majority of them moved upstream  
465 within the first or second favorable opportunity. In Experiment #2, a small number of juvenile  
466 steelhead trout remained in the release pool throughout the first few weeks of the study, but the  
467 majority of those were detected upstream at a later date by the permanent antennas. The  
468 upstream antennas had a much higher efficiency in detecting coho salmon relative to steelhead  
469 trout, probably in part due to the antenna locations, which were placed in deep slow water habitat  
470 favored by coho salmon, as opposed to the faster and more turbulent water preferred by  
471 steelhead. Juvenile coho salmon reliably move to pools with cover (which is where the upstream  
472 antennas were placed), whereas juvenile steelhead trout occupied a variety of habitats. We also  
473 note that the habitat in the release pool was not poor quality, with good depth, cover and aeration  
474 (Figs 4 and 9), and the initial lack of upstream movement by some individuals may have been  
475 due to the fact that they found the release pool to be suitable habitat.

476         There are surprisingly few studies of specific conditions under which juvenile salmonid  
477 (or other species) crossed instream barriers, whether natural or artificial, and even fewer studies  
478 documenting the hydraulic and hydrologic conditions under which juvenile fishes cross beaver  
479 dams, and especially during low-flow conditions. Guidelines for adult fish passage suggest that  
480 the pool depth in pool-weir passage routes be at least twice the length of the fish, and for ramps  
481 that the depth be at least as much as the body height of the fish, conditions that were easily met  
482 for our juvenile fish in our experimental conditions [50] [51]. Guidelines for jump heights at  
483 pool-weir fish passage facilities (i.e. the difference in water surface elevations between two

484 consecutive pools) generally ranges between 15-20 cm, conditions that were not met under our  
485 “pool-weir” passage option [30] [31].

486 That close to half of the juveniles in Experiment #2 crossed a 40-cm (4-5 body lengths)  
487 jump, even when a much gentler sloping cobble ramp was available a few meters away suggests  
488 that for beaver dams or naturalistic beaver dam-like structures, current jump height guidelines,  
489 which generally try to keep jump heights to  $\leq 15$  cm, may need revising. Such jump height  
490 guidelines were generally developed to ensure that fish (primarily salmonids) can pass culverts,  
491 diversion dams, hydropower dams and other human-built instream obstructions. However, the  
492 hydraulics of such structures are quite different from those of beaver dams. Consider culverts for  
493 example, which fish may have an initial jump to get into, and then face a long swim through high  
494 velocity water to reach the upstream end of the culvert. Such a challenge potentially exceeds the  
495 swimming capabilities of juvenile or even adult salmonids. In contrast, the hydraulic conditions  
496 at the preferred jump passage route at the BDAs require a fish to begin at a pool with a depth of  
497 5-6 body lengths, and then jump or swim up a waterfall that has a high velocity segment  
498 extending no more than 15 cm swim distance (about 2 body lengths) followed by a deep ( $> 6$   
499 body lengths), low velocity pool with cover immediately upstream (Fig 9). Thus, not  
500 unexpectedly, experiments of fish passage through culverts (usually with hatchery fish) have  
501 observed much lower successful jump heights than the results we observed with wild fish  
502 jumping over beaver dams [52].

503 Alternatively, the side channel passage consisted of a short, high gradient (8-11%) flow  
504 path, but with extensive channel roughness in the form of cobbles that dissipate energy. For a  
505 juvenile salmonid, this flow path appears as a series of small chutes and pools with the roughness

506 creating turbulent flow and relatively low velocity conditions (Fig 9). These hydraulic conditions  
507 are significantly different than a culvert or cement flume angled to a 8-11% slope, which would  
508 tend to have more laminar and uniform flow. We did not find specific guidelines for the  
509 acceptable length and slope of embedded rock ramps that is thought to ensure fish passage, but  
510 recommendations for culverts are generally that the slope should be close to zero or at least  
511 consistent with the upstream and downstream stream slope [30] [31]. For adult salmonids, we  
512 found examples of sloped flow-ways that provided passage, but the physical characteristics were  
513 not well described [53]. For our study, we provided the equivalent of an embedded rock ramp  
514 that was generally at least a juvenile fish height deep, with an 8-11% slope, a total distance  
515 ranging from about 50-250 juvenile fish lengths and a discharge of about 0.03 m<sup>3</sup>/s. To the best  
516 of our knowledge, this study provides the first quantitative data for hydraulic conditions (velocity  
517 and depth) in the field under which juvenile salmonids cross natural or naturalistic instream  
518 barriers such as beaver dams or BDAs both by jumping and through the use of short but steep  
519 side channels.

520         Because our study also showed dense concentrations of juvenile coho salmon and  
521 steelhead trout in the ponds upstream of the beaver dams (consistent with other studies), it raises  
522 a larger philosophical question as to how to weigh the benefit of the habitat created upstream of a  
523 barrier such as a beaver dam against the cost that it might not be passable to all species at all  
524 their different life-history stages and under all flow conditions. Upon review we found that most  
525 studies suggest that fishes, and in particular salmonids, benefit from natural obstructions such as  
526 beaver dams [6, 26, 38], while studies suggesting that beaver dams are detrimental to fish are

527 uncommon, and typically indicate a temporally intermittent negative impact, with no indication  
528 of a population-level effect [28].

529 For example, over a period of 12 years in Nova Scotia, it was observed that in years with  
530 low flow, adult Atlantic salmon were unable to pass over some beaver dams and thus spawned  
531 lower in the system, but in most years, beaver dams had no detectable effect on the distribution  
532 of spawning redds [54]. In Utah it was observed that beaver dams appeared to impede the  
533 movement of invasive brown trout (*Salmo trutta*), but not native brook or cutthroat trout [29],  
534 whereas in California it was observed that brook, brown and rainbow trout regularly crossed  
535 beaver dams in both an upstream and downstream direction, but that the loss of beaver dams  
536 after severe flooding decreased the brown trout population [55]. In a Midwestern stream it was  
537 observed that fish movement of multiple species was linked to flow, with more downstream  
538 movement occurring during periods of elevated discharge [56].

539 None of these studies considered whether there were any population-level effects, nor did  
540 they examine similar habitat without beaver as a comparison, or consider that it might be  
541 advantageous for fishes not to cross beaver dams. For example, in the Nova Scotia study, it was  
542 left undiscussed the possibility that the Atlantic salmon may have found it more advantageous in  
543 drought years to spawn in the lower reaches of a stream, and below beaver dams, because of  
544 improved flow conditions downstream, potentially a result of water stored behind the upstream  
545 beaver dams[54]. As another example, in Washington, a telemetry study of the rare Salish sucker  
546 (*Catostomus catostomus*) indicated that they rarely crossed beaver dams, but then a later study at  
547 the same site indicated that the highest number of suckers were in the beaver pond complexes,  
548 and that the habitat was consistent with habitat descriptions of “good” sucker habitat [57].

549           At our study site, we demonstrated that the ponds upstream of the dams produced  
550 thousands of fishes, from a reach that formerly ran dry during the summer. This indicates that  
551 breaching the dams (and thus draining the ponds) to ensure fish passage would have likely  
552 resulted in a net loss of benefit. Because we also demonstrated juvenile fish passage, a decision  
553 to breach the dam (to comply with 15 cm fish passage jump heights) would clearly have been  
554 detrimental to the species. However in other situations, where there are not data to assist with  
555 decision-making and where flow conditions may be different, the decision of whether to remove  
556 or modify an obstruction so that it complies with fish passage guidelines, or to require a  
557 proposed restoration structure to comply with fish passage guidelines, may be less clear. The  
558 data from our study provide some general guidance, which suggests that knowledge of how fish  
559 use a particular stream system and the relative abundance of different habitat types within the  
560 system is key to understanding how to manage instream obstructions such as beaver dams.

561           For coho salmon, the target species of the restoration project, the data suggest that if adult  
562 fish are spawning above the dams, then the offspring of such adults will have access to the ponds  
563 and upstream fish passage for these juveniles is less important. We think that because  
564 outmigrating juveniles time their downstream movements to coincide with high flows, concerns  
565 over passability at this life-history stage are less warranted. For adult salmon, an assessment of  
566 hydraulic conditions at a time when adults are trying to move past the structure is essential to  
567 assess whether or not the structure may be blocking movement, but even then, a consideration of  
568 the juvenile overwintering habitat that will be lost if the dam is breached needs to be weighed  
569 against the potential benefits to having an increased number of fish spawning upstream.

570 Overall, we suggest that unless there is clear and compelling evidence that a beaver dam or  
571 BDAs are preventing the movement of fishes *and* that this is likely to have a population-level  
572 effect, such structures should not be removed. Options such as temporarily notching may be an  
573 alternative under some conditions, such as the presence of adult salmon stacking up below a  
574 dam, but guidelines need developing. For human-built structures such as BDAs and other weirs,  
575 we suggest that our data provide some guidance as to what constitutes a passable structure, but  
576 that more examples from the field are needed under a wider range of flow conditions.

577 Studies that assess the costs and benefits of a structure to a fish population are essential.  
578 Because beaver dams and similar structures can provide extensive habitat upstream, the cost of  
579 impaired fish passage needs to be weighed against the upstream habitat benefits accrued. In  
580 general the benefits of increased connectivity, that is access to habitat, needs to be weighed  
581 against the quality of the habitat that is available to use. We speculate that in the case of coho  
582 salmon, decades of emphasizing habitat connectivity over habitat quality by removing perceived  
583 obstructions to fish passage is a significant contributing factor to their widespread decline..

584 Studies from Alaska to California suggest that where abundant instream obstructions that  
585 create deep slow-water habitat, coho salmon thrive, and that conversely, where such habitat is  
586 rare or absent, coho salmon are typically rare or absent [45, 58]. While connectivity in fluvial  
587 systems is in general an important goal, the pursuit of that goal needs to be tempered against the  
588 need for creating habitat of a type and quality to which species have adapted. Species have  
589 adapted to and evolved in the presence of instream obstructions such as beaver dams and wood  
590 jams. Numerous species utilize the complex and dynamic pool, pond and wetland habitat created  
591 by such obstructions and some of those species are in steep population decline. In addition to

592 coho salmon, other rare or endangered species that benefit from beaver ponds include the willow  
593 fly catcher and yellow-legged frog [[59-63](#)]. We suggest the need for a more nuanced approach to  
594 fluvial ecosystem management, an approach that recognizes that a dynamic tension exists  
595 between the need for habitat connectivity and habitat quality, between the need for fast-water  
596 habitat and slow-water habitat. We suggest that different species, life-history stages within a  
597 species and even different life-history strategies within a cohort of the same species have  
598 differing, and at times competing aquatic habitat needs, and that management strategies that  
599 more explicitly recognize that such variation exists would lead to more successful recovery of a  
600 number of aquatic and riparian-dependent species in decline, including coho salmon.

## 601 **ACKNOWLEDGEMENTS**

602 Numerous individuals contributed to this study in large and small ways and are listed in  
603 now particular order of importance. Internal peer-reviewers at NOAA were Colin Nicols, David  
604 White and George Pess, all of whom made substantive contributions that improved the quality of  
605 this manuscript. Bob Pagliucco of the NOAA Restoration Center provided input into the study  
606 design. Special thanks to Jeff Fowle and the Farmers Ditch Company, LLC and Mike Kalpin for  
607 allowing the use of their private property for this experiment. Betsy Stapleton, Charnna Gilmore,  
608 Peter Thamer, Wade Dedobbeler, Dale Munson, Linda Baily and Amanda Planck, all of the Scott  
609 River Watershed Council contributed to the data collection and restoration effort and the  
610 complex logistics of managing an experiment in a remote location. Garreth and Millie Planck of  
611 Scott River Ranch, LLC provided early insight and commentary that was helpful in the



612 development of the study design. Mark Cookson of the US Fish and Wildlife Service and Donald  
613 Flickinger of NOAA provided initial permitting assistance and project support. This project was  
614 funded internally at the NOAA's Northwest Fisheries Science Center, NOAA's California  
615 Coastal Office, Klamath Branch, and the NOAA Restoration Center.

## 616 REFERENCES

- 617 1. Graf WL. Dam nation: A geographic census of American dams and their large-scale  
618 hydrologic impacts. *Water resources research*. 1999;35(4):1305-11.
- 619 2. Poff NL, Hart DD. How dams vary and why it matters for the emerging science of dam  
620 removal: an ecological classification of dams is needed to characterize how the  
621 tremendous variation in the size, operational mode, age, and number of dams in a river  
622 basin influences the potential for restoring regulated rivers via dam removal. *BioScience*.  
623 2002;52(8):659-68.
- 624 3. Kiffney PM, Pess GR, Anderson JH, Faulds P, Burton K, Riley SC. Changes in fish  
625 communities following recolonization of the Cedar River, WA, USA by Pacific salmon  
626 after 103 years of local extirpation. *River Research and Applications*. 2009;25(4):438-52.
- 627 4. Brink K, Gough P, Royte J, Schollemma P, Wan-ningen H. From Sea to Source 2.0.  
628 Protection and restoration of fish migration in rivers worldwide. World Fish Migration  
629 Foundation: Groningen, Netherlands. 2018.
- 630 5. Muller-Schwarze D, Lixing S. The beaver: Natural history of a wetlands engineer.  
631 Cornell: Cornell University Press; 2003.
- 632 6. Pollock MM, Heim M, Werner D. Hydrologic and geomorphic effects of beaver dams  
633 and their influence on fishes. In: Gregory SV, Boyer K, Gurnell A, editors. The ecology  
634 and management of wood in world rivers. Bethesda, Maryland: American Fisheries  
635 Society; 2003. p. 213-33.

- 636 7. Seton ET. Lives of game animals. Garden City, New York, USA: Doubleday, Doran and  
637 Co., Inc.; 1929.
- 638 8. Abbe TB, Montgomery DR. Patterns and processes of wood debris accumulation in the  
639 Queets river basin, Washington. *Geomorphology*. 2003;51(1-3):81-107.
- 640 9. Collins BD, Montgomery DR, Fetherston KL, Abbe TB. The floodplain large-wood cycle  
641 hypothesis: a mechanism for the physical and biotic structuring of temperate forested  
642 alluvial valleys in the North Pacific coastal ecoregion. *Geomorphology*. 2012;139:460-  
643 70.
- 644 10. Wohl E. A legacy of absence: wood removal in US rivers. *Progress in Physical  
645 Geography*. 2014;38(5):637-63.
- 646 11. Walter RC, Merritts DJ. Natural streams and the legacy of water-powered mills. *Science*.  
647 2008;319(5861):299-304.
- 648 12. Sedell JR, Froggatt JL, editors. Importance of streamside forests to large rivers: The  
649 isolation of the Willamette River, Oregon, USA, from its floodplain by snagging and  
650 streamside forest removal; Congress in France. (22) Congress of the International  
651 Association of Limnology; 1983 21 Aug 1983; Lyon (France).
- 652 13. Wells HL. History of Siskiyou County, California...: Containing Portraits and  
653 Biographies of Its Leading Citizens and Pioneers: DJ Stewart; 1881.
- 654 14. Naiman RJ, Johnston CA, Kelley JC. Alteration of North American streams by beaver.  
655 *BioScience*. 1988;38(11):753-61.
- 656 15. Polvi LE, Wohl E. Biotic drivers of stream planform: implications for understanding the  
657 past and restoring the future. *BioScience*. 2013;63(6):439-52.
- 658 16. Demmer R, Beschta RL. Recent History (1988-2004) of Beaver Dams along Bridge  
659 Creek in central Oregon. *Western North American Naturalist*. 2008;32:309-18.

- 660 17. Burchsted D, Daniels M, Thorson R, Vokoun J. The river discontinuum: applying beaver  
661 modifications to baseline conditions for restoration of forested headwaters. *BioScience*.  
662 2010;60(11):908-22.
- 663 18. Rosell F, Bozser O, Collen P, Parker H. Ecological impact of beavers *Castor fiber* and  
664 *Castor canadensis* and their ability to modify ecosystems. *Mammal review*.  
665 2005;35(3-4):248-76.
- 666 19. Gurnell AM, Bickerton M, Angold P, Bell D, Morrissey I, Petts GE, et al. Morphological  
667 and ecological change on a meander bend: the role of hydrological processes and the  
668 application of GIS. *Hydrological Processes [Hydrol Process]*. 1998;12(6):981-93.
- 669 20. Westbrook CJ, Cooper DJ, Baker BW. Beaver dams and overbank floods influence  
670 groundwater-surface water interactions of a Rocky Mountain riparian area. *Water*  
671 *Resources Research*. 2006;42:1-12.
- 672 21. Pollock MM, Beechie TJ, Jordan CE. Geomorphic changes upstream of beaver dams in  
673 Bridge Creek, an incised stream in the interior Columbia River basin. *Earth Surface*  
674 *Processes and Landforms*. 2007;32:1174-85.
- 675 22. Dittbrenner BJ, Pollock MM, Schilling JW, Olden JD, Lawler JJ, Torgersen CE.  
676 Modeling intrinsic potential for beaver (*Castor canadensis*) habitat to inform restoration  
677 and climate change adaptation. *PLOS ONE*. 2018;13(2):e0192538.
- 678 23. Westbrook C, Cooper D, Baker B. Beaver assisted river valley formation. *River Research*  
679 *and Applications*. 2011;27(2):247-56.
- 680 24. Nyssen J, Pontzele J, Billi P. Effect of beaver dams on the hydrology of small mountain  
681 streams: example from the Chevral in the Ourthe Orientale basin, Ardennes, Belgium.  
682 *Journal of hydrology*. 2011;402(1-2):92-102.
- 683 25. Curran JC, Cannatelli KM. The impact of beaver dams on the morphology of a river in  
684 the eastern United States with implications for river restoration. *Earth Surface Processes*  
685 *and Landforms*. 2014;39(9):1236-44.

- 686 26. Collen P, Gibson RJ. The general ecology of beavers (*Castor* spp.), as related to their  
687 influence on stream ecosystems and riparian habitats, and the subsequent effects on fish -  
688 a review. *Reviews in Fish Biology and Fisheries*. 2000;10(4):439-61.
- 689 27. Tedford RH, Harington CR. An Arctic mammal fauna from the early Pliocene of North  
690 America. *Nature*. 2003;425(6956):388.
- 691 28. Kemp PS, Worthington TA, Langford TE, Tree AR, Gaywood MJ. Qualitative and  
692 quantitative effects of reintroduced beavers on stream fish. *Fish and Fisheries*.  
693 2012;13(2):158-81.
- 694 29. Lokteff RL, Roper BB, Wheaton JM. Do beaver dams impede the movement of trout?  
695 *Transactions of the American Fisheries Society*. 2013;142(4):1114-25.
- 696 30. WDFW. Fish Passage and Surface Water Diversion Screening Assessment and  
697 Prioritization Manual. Washington Department of Fish and Wildlife. Olympia  
698 Washington. United States; 2009.
- 699 31. NMFS. Anadromous Salmonid Passage Facility Design. NMFS, Northwest Region,  
700 Portland, Oregon. . Portland, Oregon: National Marine Fisheries Service; 2011.
- 701 32. CDFG. Recovery strategy for California coho salmon. Report to the California Fish and  
702 Game Commission. 594 pp. Sacramento, California: California Department of Fish and  
703 Game, 2004.
- 704 33. NMFS. Reinitiation of the Endangered Species Act Section 7 Formal Programmatic  
705 Conference and Biological Opinion and Magnuson-Stevens Fishery Conservation and  
706 Management Act Essential Fish Habitat Consultation for Aquatic Restoration Activities  
707 in the States of Oregon and Washington (ARBO II). Seattle, Washington: National  
708 Marine Fisheries Service; 2013.
- 709 34. Yochum SE. Guidance for stream restoration and rehabilitation. US Department of  
710 Agriculture, Forest Service, National Stream and Aquatic Ecology Center Technical Note  
711 no TN-1022. 2016.

- 712 35. Davee R, Gosnell H, Charnley S. Using beaver dam analogues for fish and wildlife  
713 recovery on public and private rangelands in eastern Oregon. Res Pap PNW-RP-612  
714 Portland, OR: US Department of Agriculture, Forest Service, Pacific Northwest Research  
715 Station 29 p. 2019;612.
- 716 36. Puttock A, Graham HA, Cunliffe AM, Elliott M, Brazier RE. Eurasian beaver activity  
717 increases water storage, attenuates flow and mitigates diffuse pollution from intensively-  
718 managed grasslands. *Science of the total environment*. 2017;576:430-43.
- 719 37. Fesenmyer KA, Dauwalter DC, Evans C, Allai T. Livestock management, beaver, and  
720 climate influences on riparian vegetation in a semi-arid landscape. *PLOS ONE*.  
721 2018;13(12):e0208928.
- 722 38. Goldfarb B. *Eager: The Surprising, Secret Life of Beavers and why They Matter*: Chelsea  
723 Green Publishing; 2018.
- 724 39. Bouwes N, Weber N, Jordan CE, Saunders WC, Tattam IA, Volk C, et al. Ecosystem  
725 experiment reveals benefits of natural and simulated beaver dams to a threatened  
726 population of steelhead (*Oncorhynchus mykiss*). *Scientific reports*. 2016;6:28581.
- 727 40. Pollock MM, Beechie TJ, Wheaton JM, Jordan CE, Bouwes N, Weber N, et al. Using  
728 beaver dams to restore incised stream ecosystems. *BioScience*. 2014;64(4):279-90.
- 729 41. Scamardo J, Wohl E. The geomorphic effect of beaver dam analogs in the Colorado Front  
730 Range, USA. *River Research and Applications*. In Press.
- 731 42. Pilliod DS, Rohde AT, Charnley S, Davee RR, Dunham JB, Gosnell H, et al. Survey of  
732 beaver-related restoration practices in rangeland streams of the western USA.  
733 *Environmental management*. 2018;61(1):58-68.
- 734 43. Wathen G, Allgeier JE, Bouwes N, Pollock MM, Schindler DE, Jordan CE. Beaver  
735 activity increases habitat complexity and spatial partitioning by steelhead trout. *Canadian  
736 Journal of Fisheries and Aquatic Sciences*. 2018;(999):1-10.

- 737 44. Weber N, Bouwes N, Pollock MM, Volk C, Wheaton JM, Wathen G, et al. Alteration of  
738 stream temperature by natural and artificial beaver dams. PloS one.  
739 2017;12(5):e0176313.
- 740 45. NMFS. Final recovery plan for southern Oregon/northern California coast Coho Salmon  
741 (Oncorhynchus kisutch). Arcata, California: National Marine Fisheries Service; 2014.
- 742 46. Fiorini-Jenner GL, Hall MJ. Western Siskiyou county: Gold and dreams: Island Press;  
743 2002.
- 744 47. Mack S. Geology and Ground-water Features of Scott Valley, Siskiyou County,  
745 California. 1958.
- 746 48. Pollock M, Lewallen G, Woodruff K, Jordan C, Castro J. The beaver restoration  
747 guidebook: Working with beaver to restore streams, wetlands, and floodplains. United  
748 States Fish and Wildlife Service. 2017.
- 749 49. Forty M, Spees J, Lucas MC. Not just for adults! Evaluating the performance of multiple  
750 fish passage designs at low-head barriers for the upstream movement of juvenile and  
751 adult trout *Salmo trutta*. Ecological Engineering. 2016;94:214-24.
- 752 50. Powers PD, Orsborn JF. Analysis of Barriers to Upstream Fish Migration. An  
753 Investigation of the Physical and Biological Conditions Affecting Fish Passage Success  
754 at Culverts and Waterfalls. Final Project Report. Part 4 of 4. Submitted to the  
755 Bonneville Power Administration, Portland, Oregon. Project No. 82-14. Portland,  
756 Oregon: Bonneville Power Administration, 1985.
- 757 51. Castro-Santos T, Haro A. Fish guidance and passage at barriers: Science Publishers:  
758 Enfield, NH; 2010.
- 759 52. Johnson GE, Pearson WH, Southard SL, Mueller RP. Upstream movement of juvenile  
760 coho salmon in relation to environmental conditions in a culvert test bed. Transactions of  
761 the American Fisheries Society. 2012;141(6):1520-31.
- 762 53. Kivari L. The wetted ramp as a useful tool to service smaller-bodied finfishes at low-head  
763 aquatic barriers. 2016.

- 764 54. Taylor BR, MacInnis C, Floyd TA. Influence of rainfall and beaver dams on upstream  
765 movement of spawning Atlantic salmon in a restored brook in Nova Scotia, Canada.  
766 *River Research and Applications*. 2010;26(2):183-93.
- 767 55. Gard R. Effects of beaver on trout in Sagehen Creek, California. *Journal of Wildlife*  
768 *Management*. 1961;25(3):221-42.
- 769 56. Schlosser IJ. Dispersal, boundary processes, and trophic-level interactions in streams  
770 adjacent to beaver ponds. *Ecology*. 1995;76(3):908-25.
- 771 57. Garrett DL, Spinelli J. The Presence of Salish Sucker and the Native Fish Fauna at Naval  
772 Radio Station Jim Creek, Washington: Washington Department of Fish and Wildlife;  
773 2017.
- 774 58. NMFS. Proposed ESA Recovery Plan for Oregon Coast Coho Salmon (*Oncorhynchus*  
775 *kisutch*) Evolutionarily Significant Unit. National Marine Fisheries Service, West Coast  
776 Region, Portland, Oregon. Portland, Oregon: National Marine Fisheries Service; 2015.
- 777 59. Lingo HA. Beaver Reintroduction Correlates with Spotted Frog Population Restoration  
778 and Terrestrial Movement Patterns of Newly Metamorphosed Columbia Spotted Frogs in  
779 the Owyhee Uplands of Southwestern Idaho: Boise State University; 2013.
- 780 60. Albert S, Trimble T. Beavers are partners in riparian restoration on the Zuni Indian  
781 Reservation. *Ecological Restoration North America*. 2000;18(2):87-92.
- 782 61. Grover AM, Baldassarre GA. Bird species richness within beaver ponds in south-central  
783 New York. *Wetlands*. 1995;15(2):108-18.
- 784 62. Hossack BR, Gould WR, Patla DA, Muths E, Daley R, Legg K, et al. Trends in Rocky  
785 Mountain amphibians and the role of beaver as a keystone species. *Biological*  
786 *Conservation*. 2015;187:260-9.
- 787 63. Dauwalter DC, Walrath JD. Beaver dams, streamflow complexity, and the distribution of  
788 a rare minnow, *Lepidomeda copei*. *Ecology of freshwater fish*. 2018;27(2):606-16.
- 789



bioRxiv preprint doi: <https://doi.org/10.1101/856252>; this version posted November 26, 2019. The copyright holder for this preprint (which was not certified by peer review) is the author/funder. This article is a US Government work. It is not subject to copyright under 17 USC 105 and is also made available for use under a CC0 license.

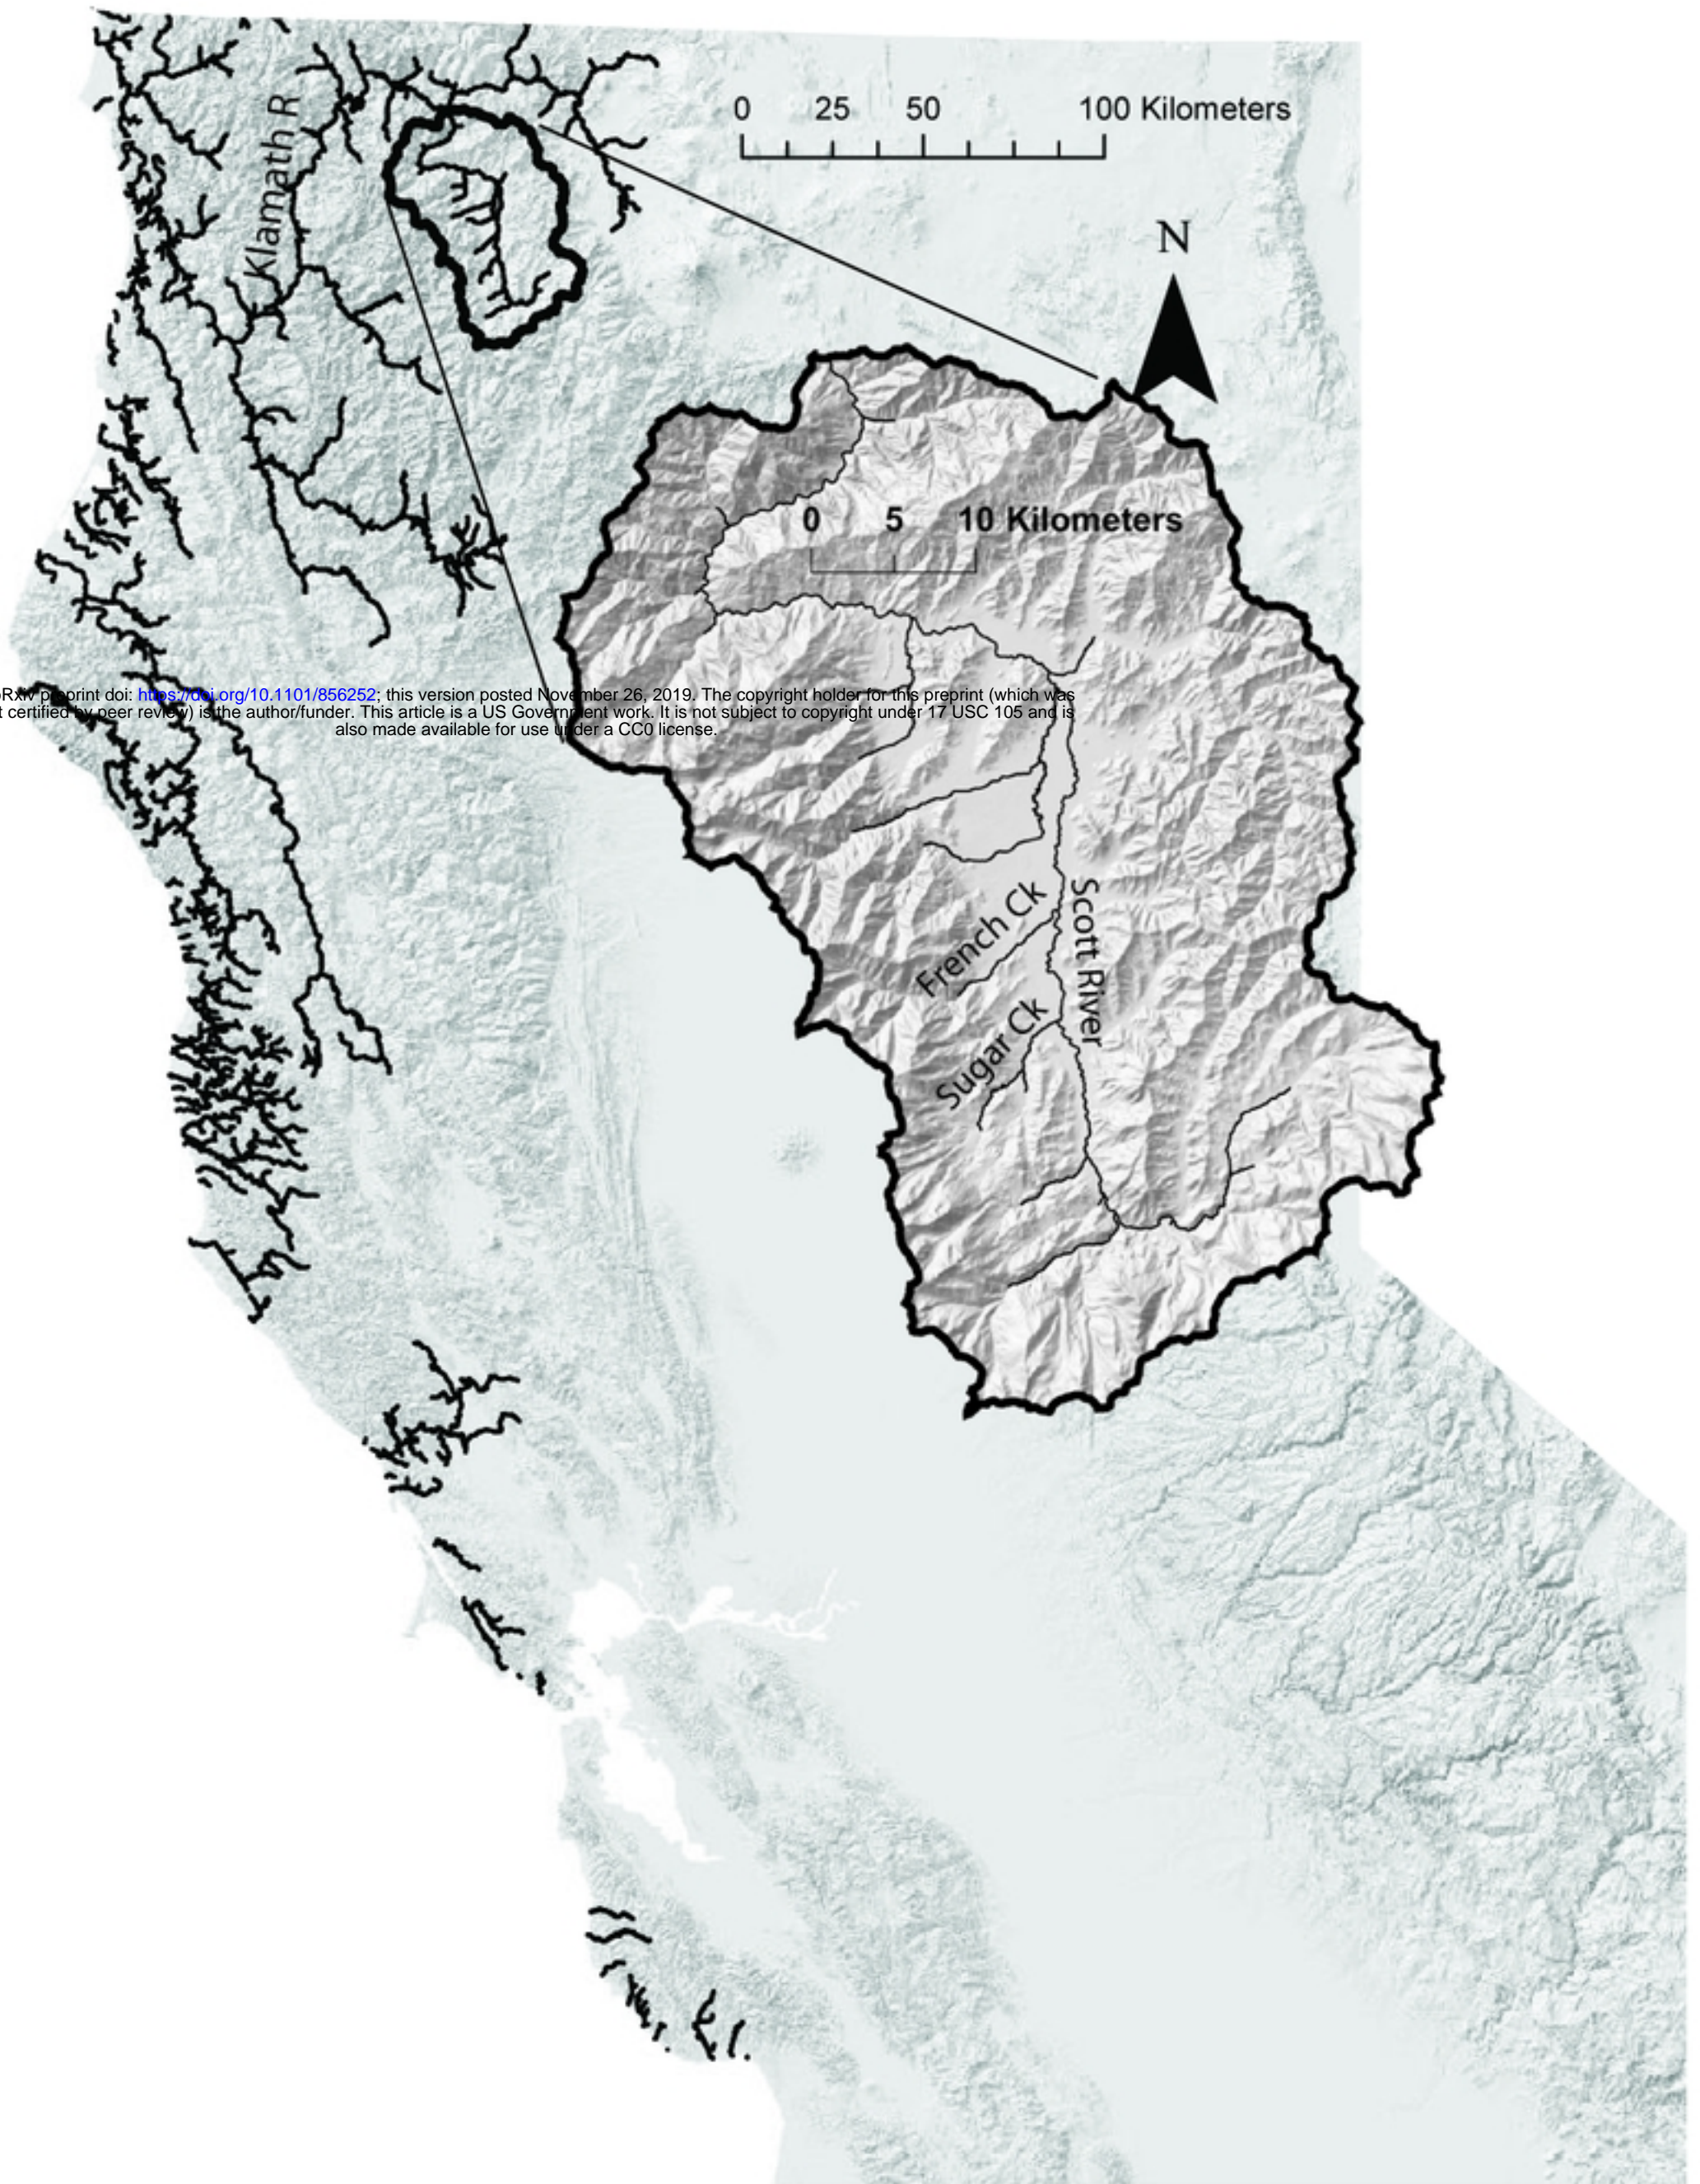



(2016)

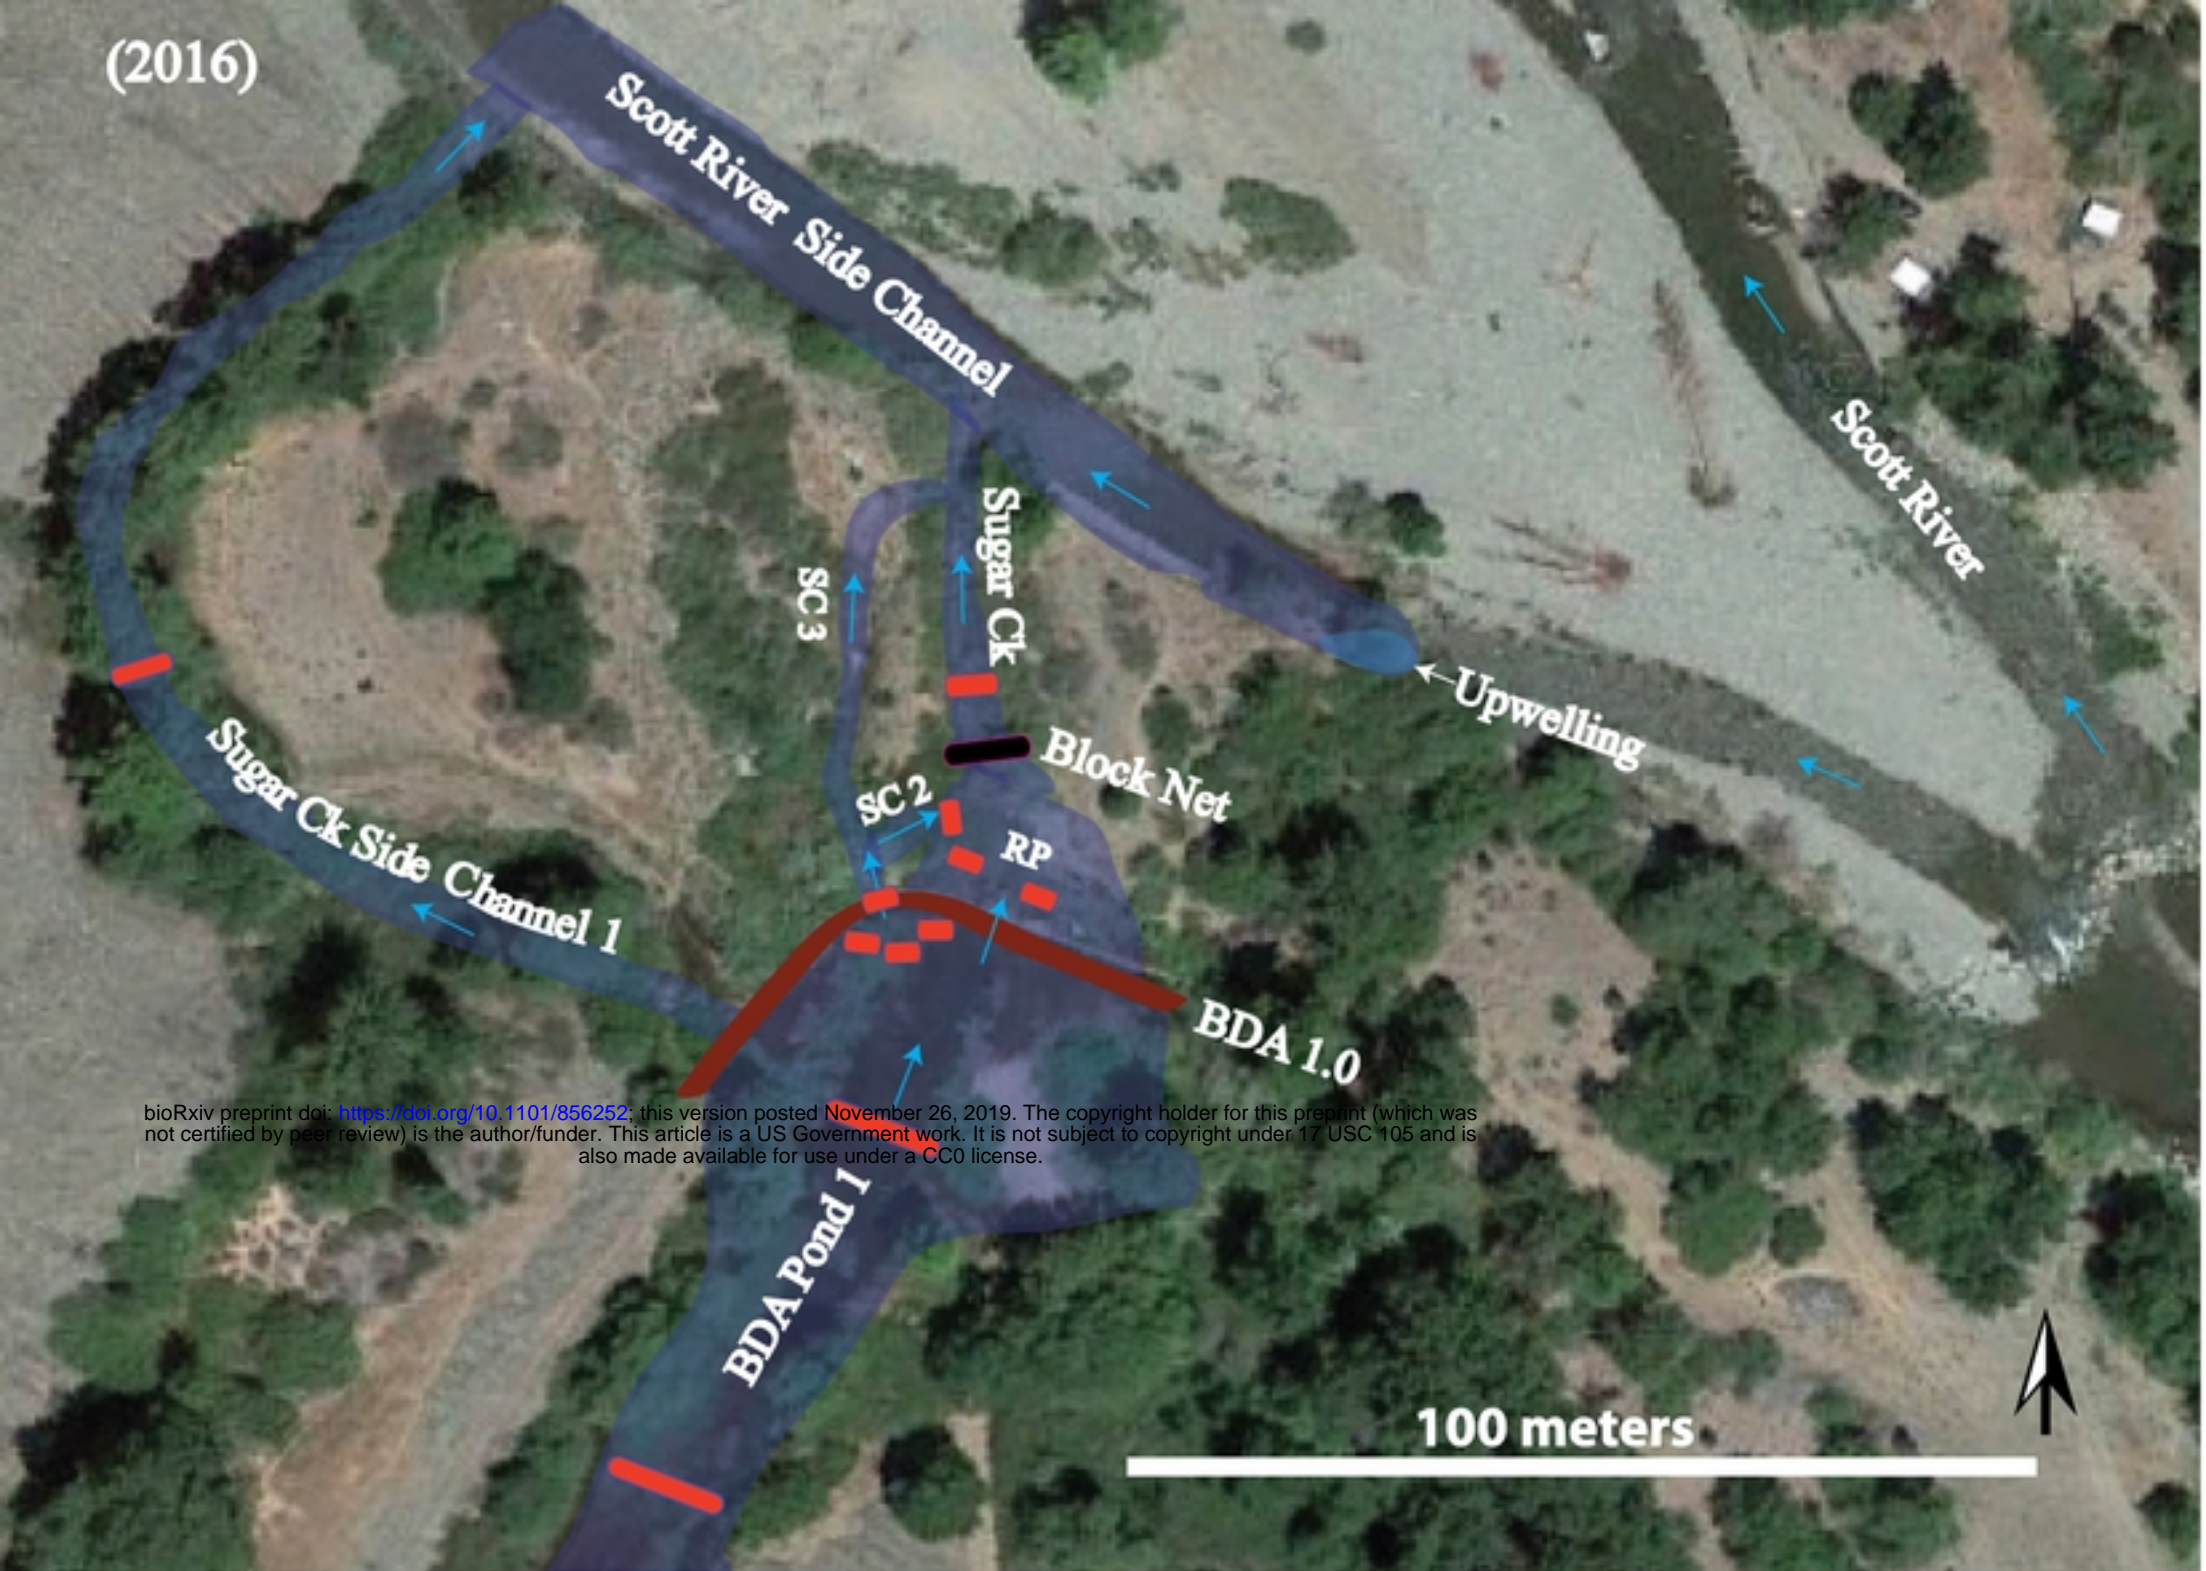

(2017)

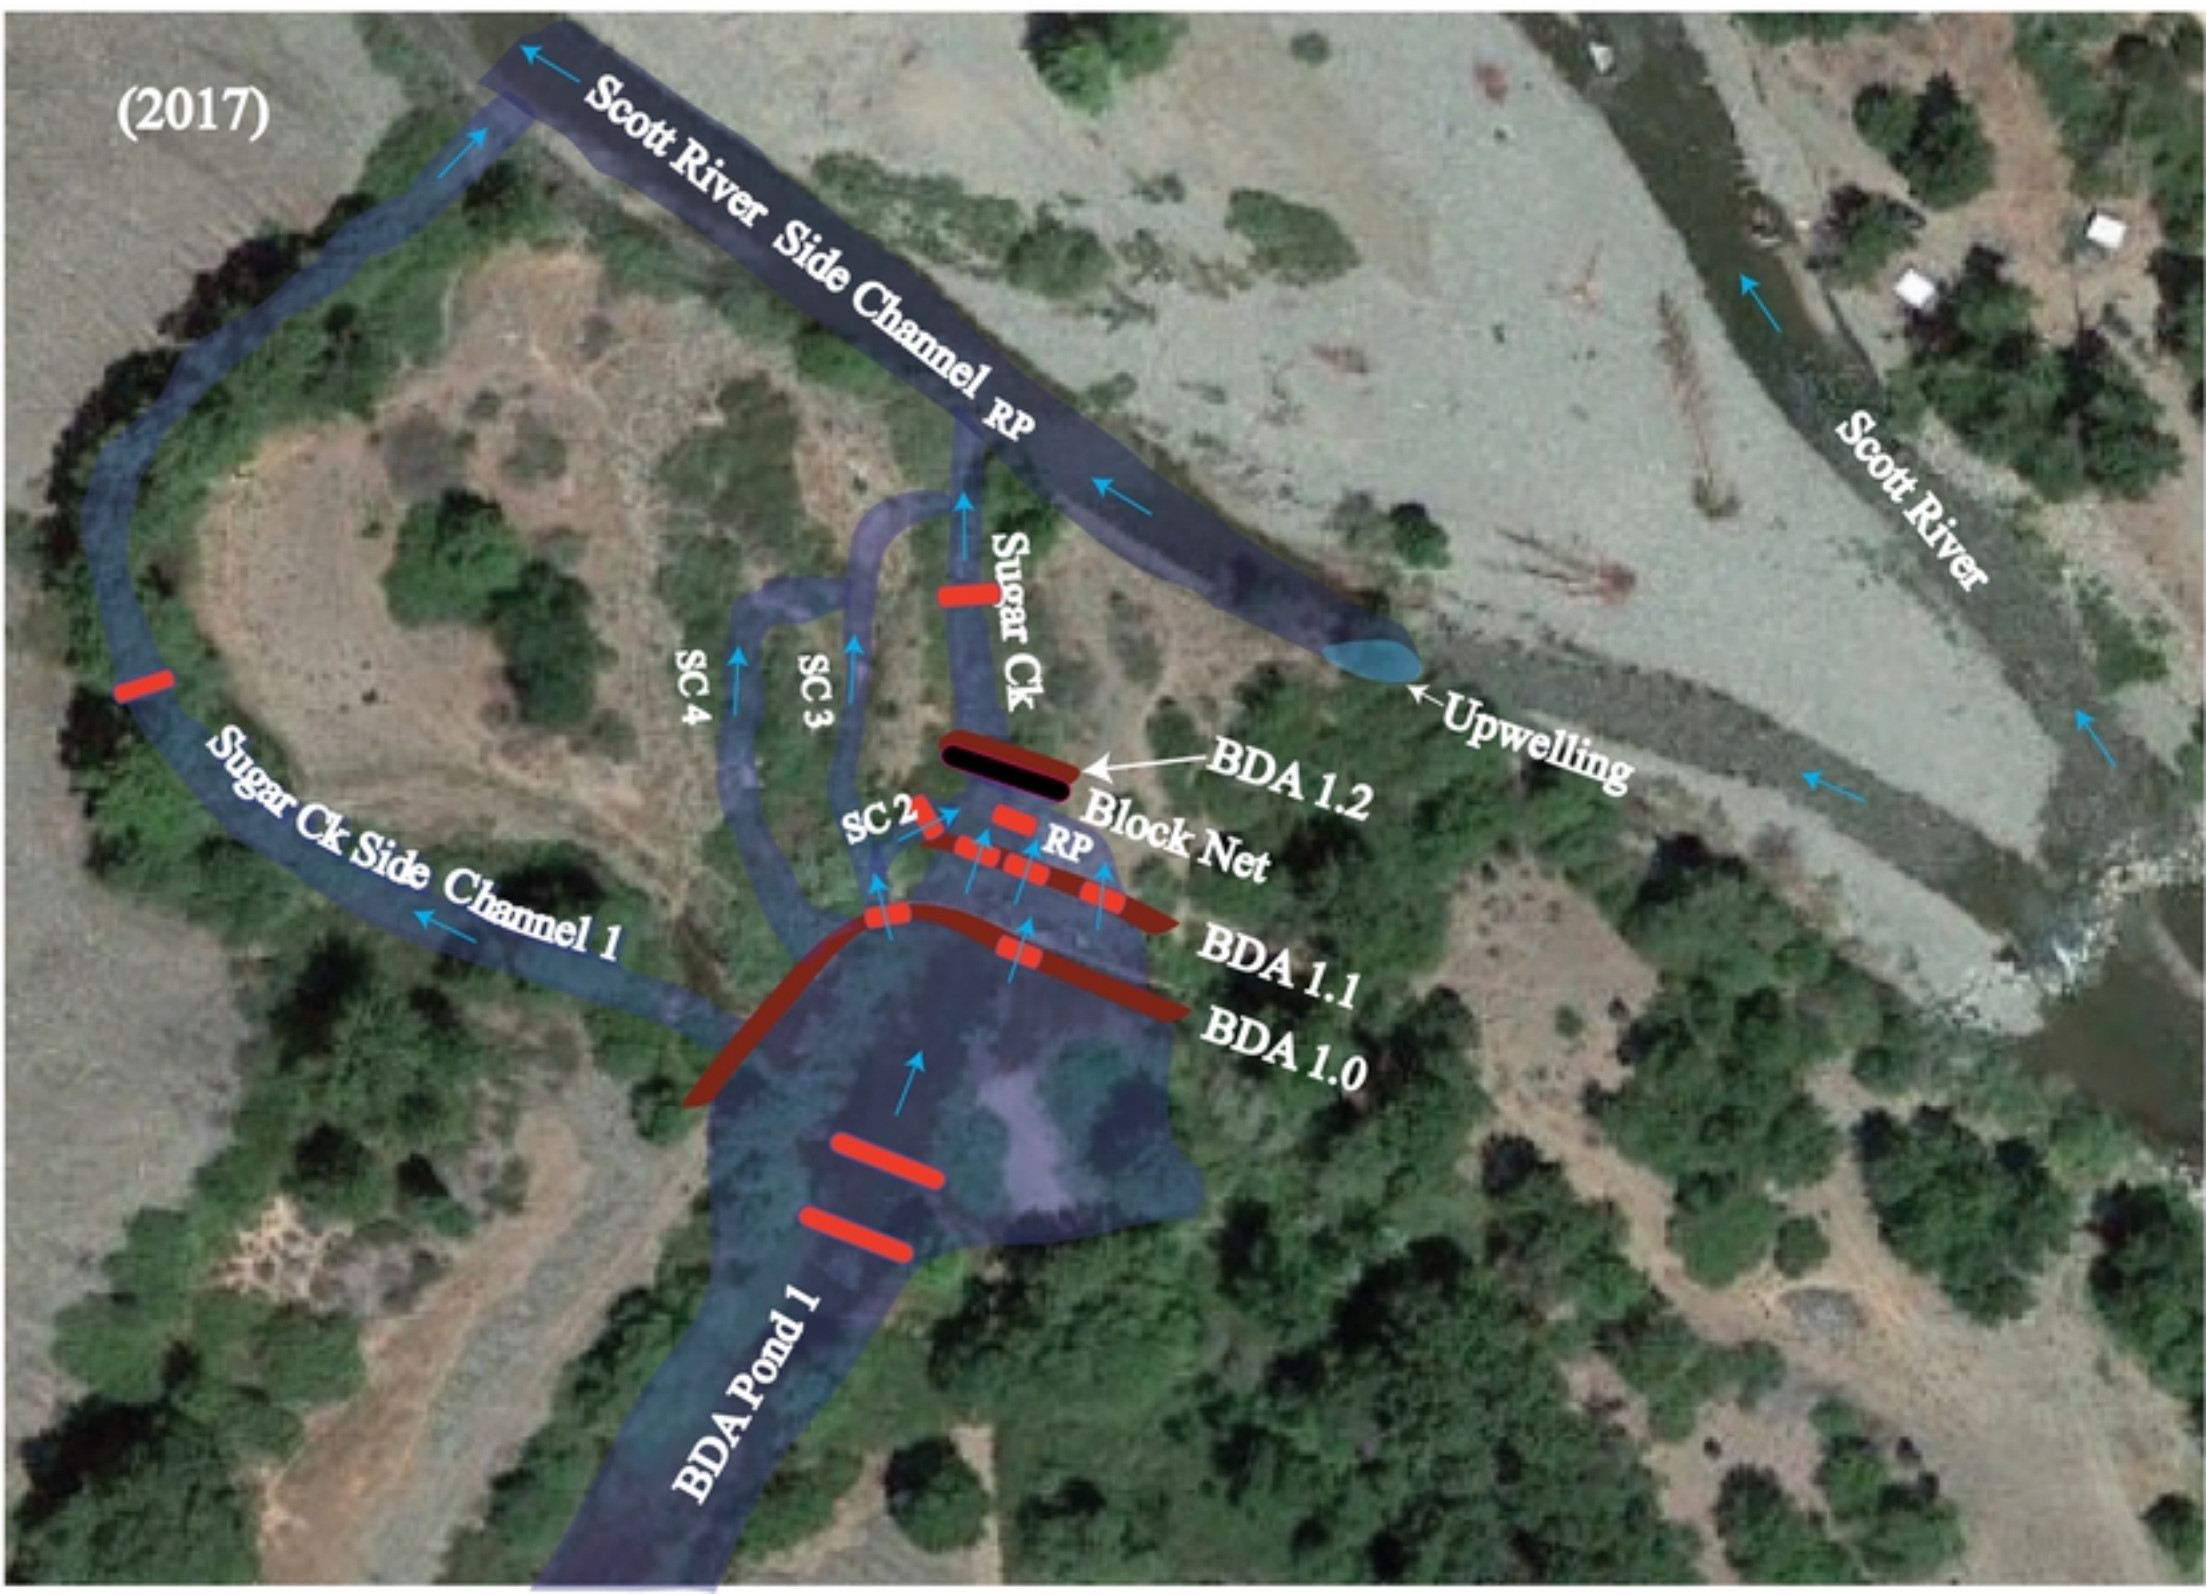



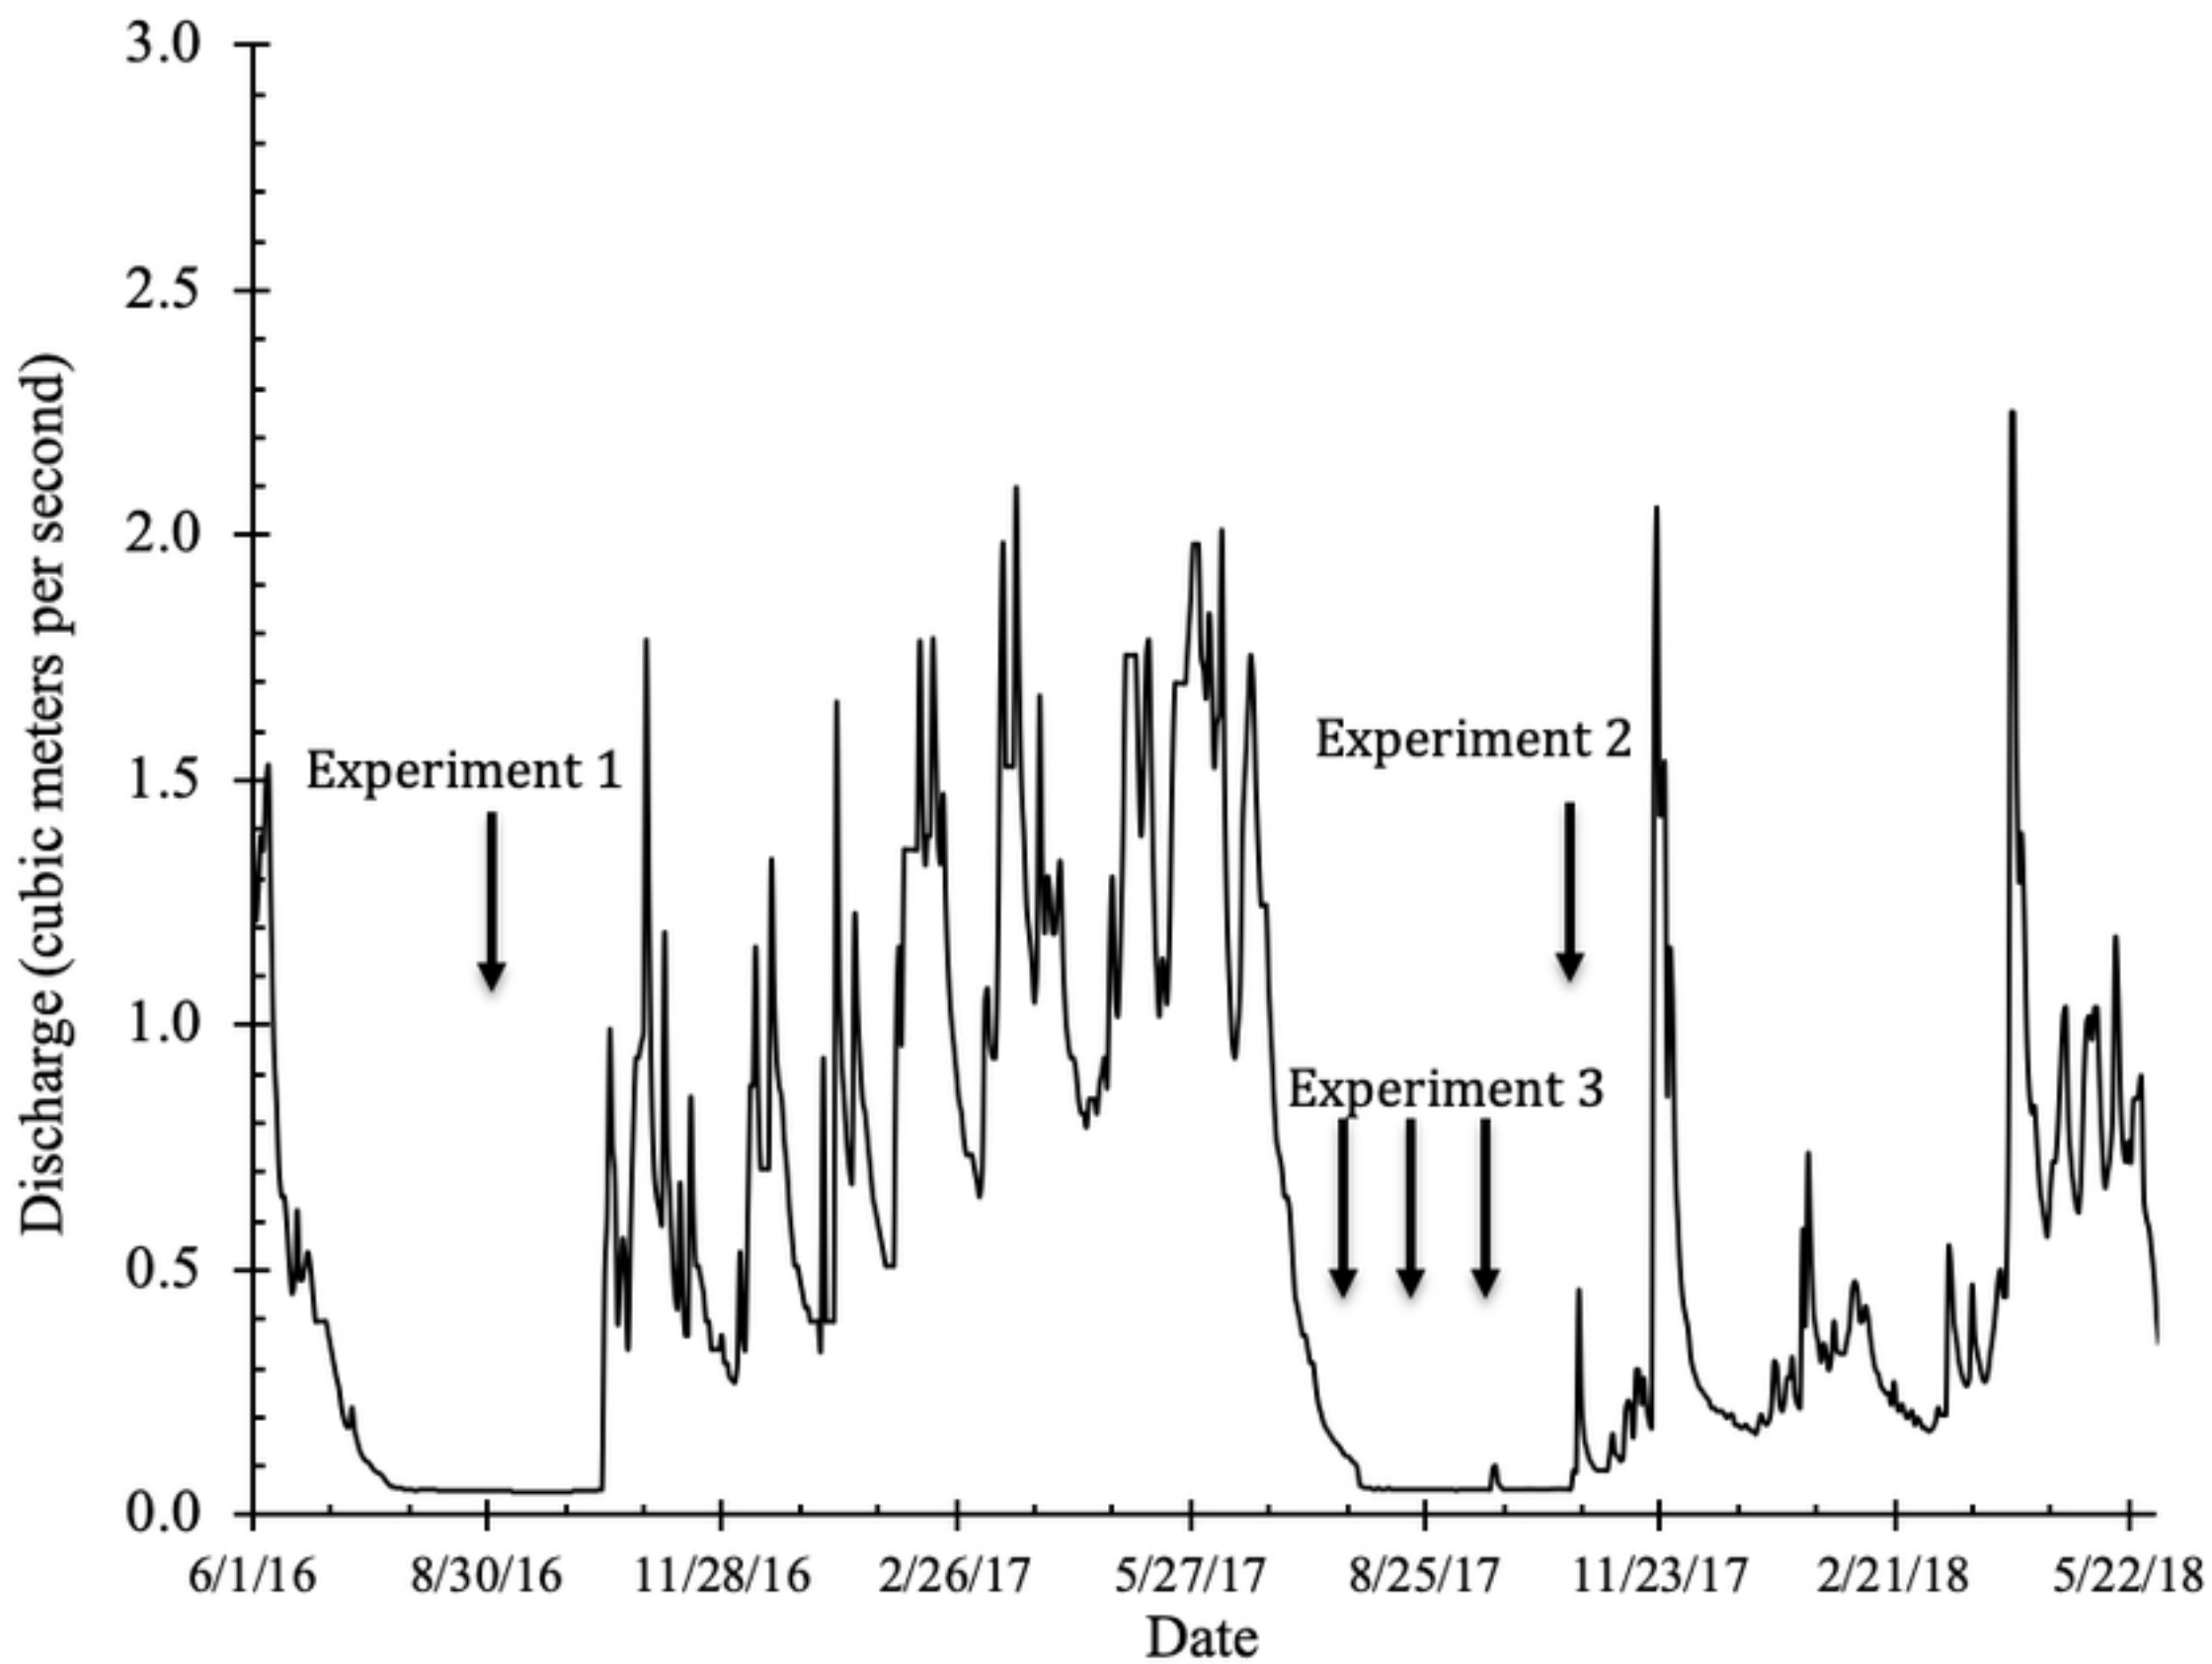

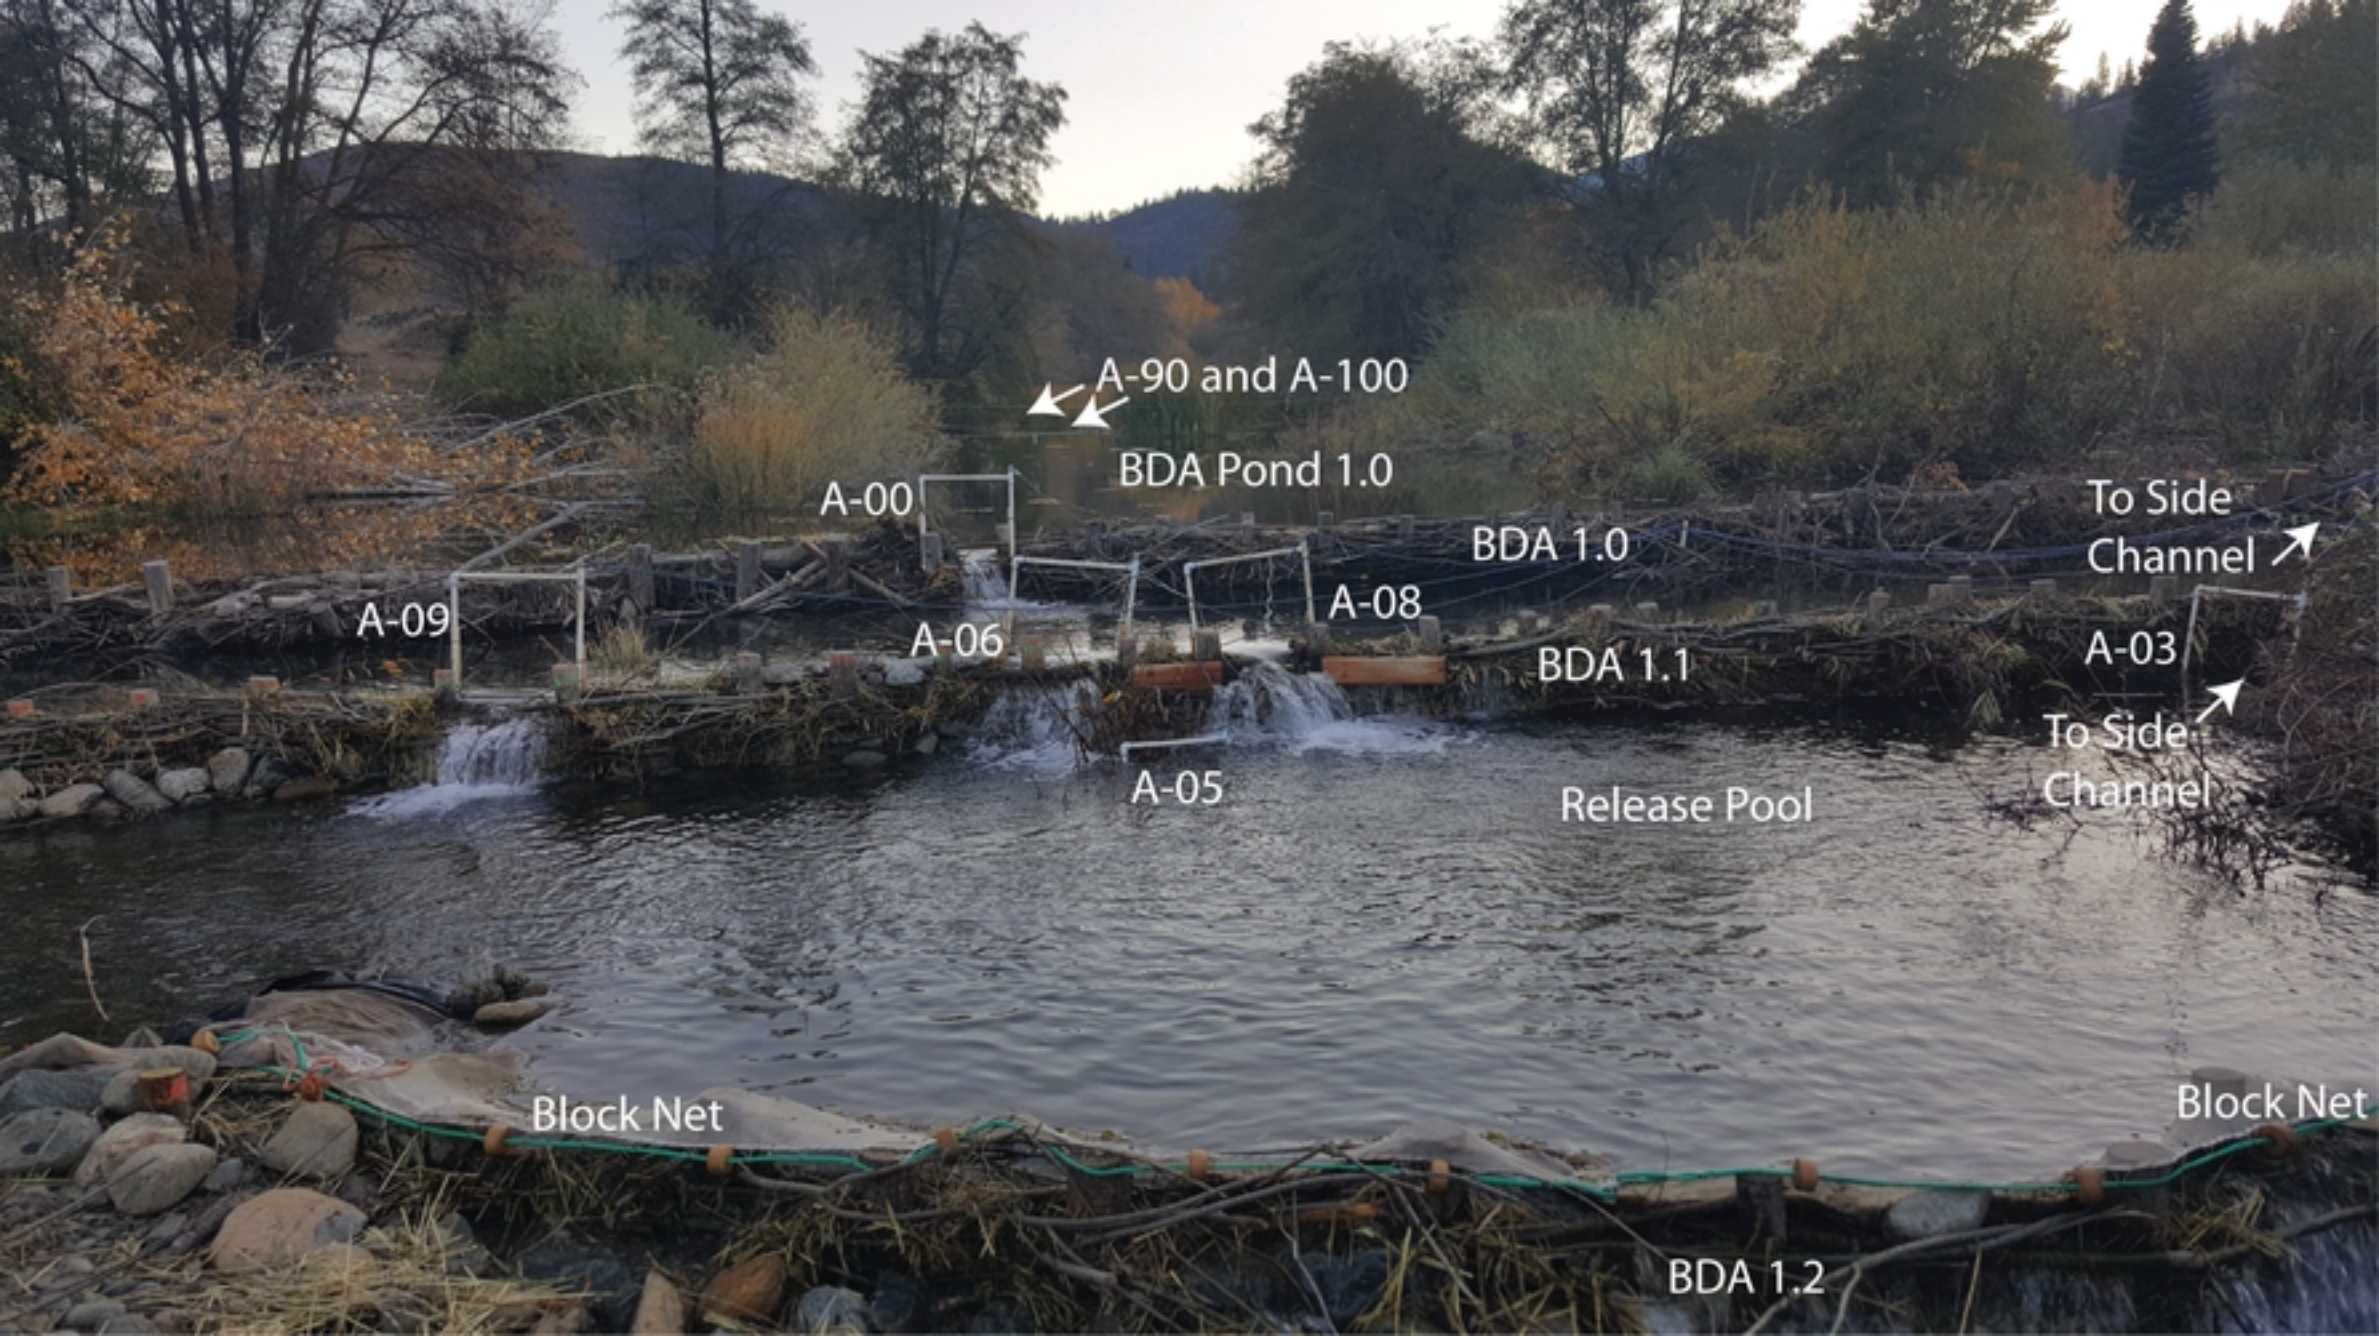

A-90 and A-100

BDA Pond 1.0

A-00

BDA 1.0

To Side Channel

A-09

A-06

A-08

BDA 1.1

A-03

To Side Channel

A-05

Release Pool

Block Net

Block Net

BDA 1.2

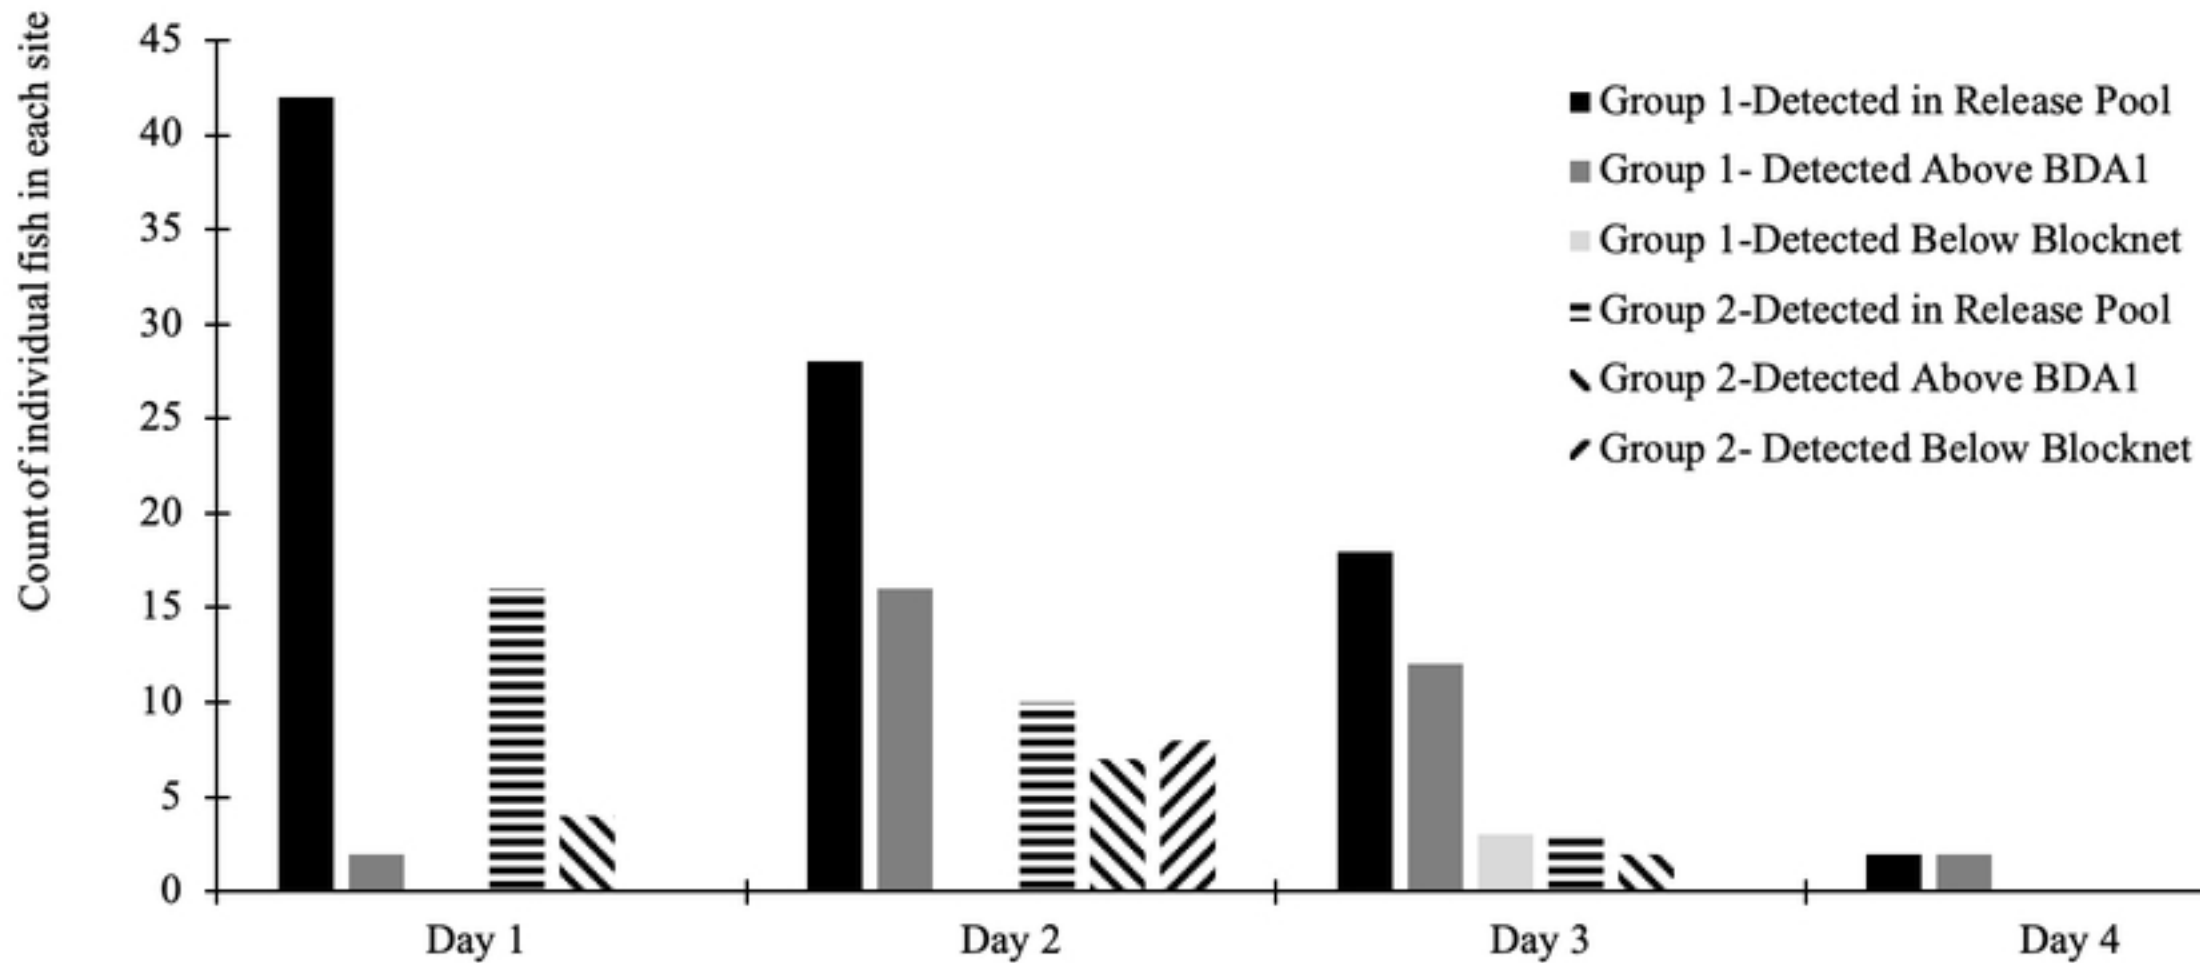

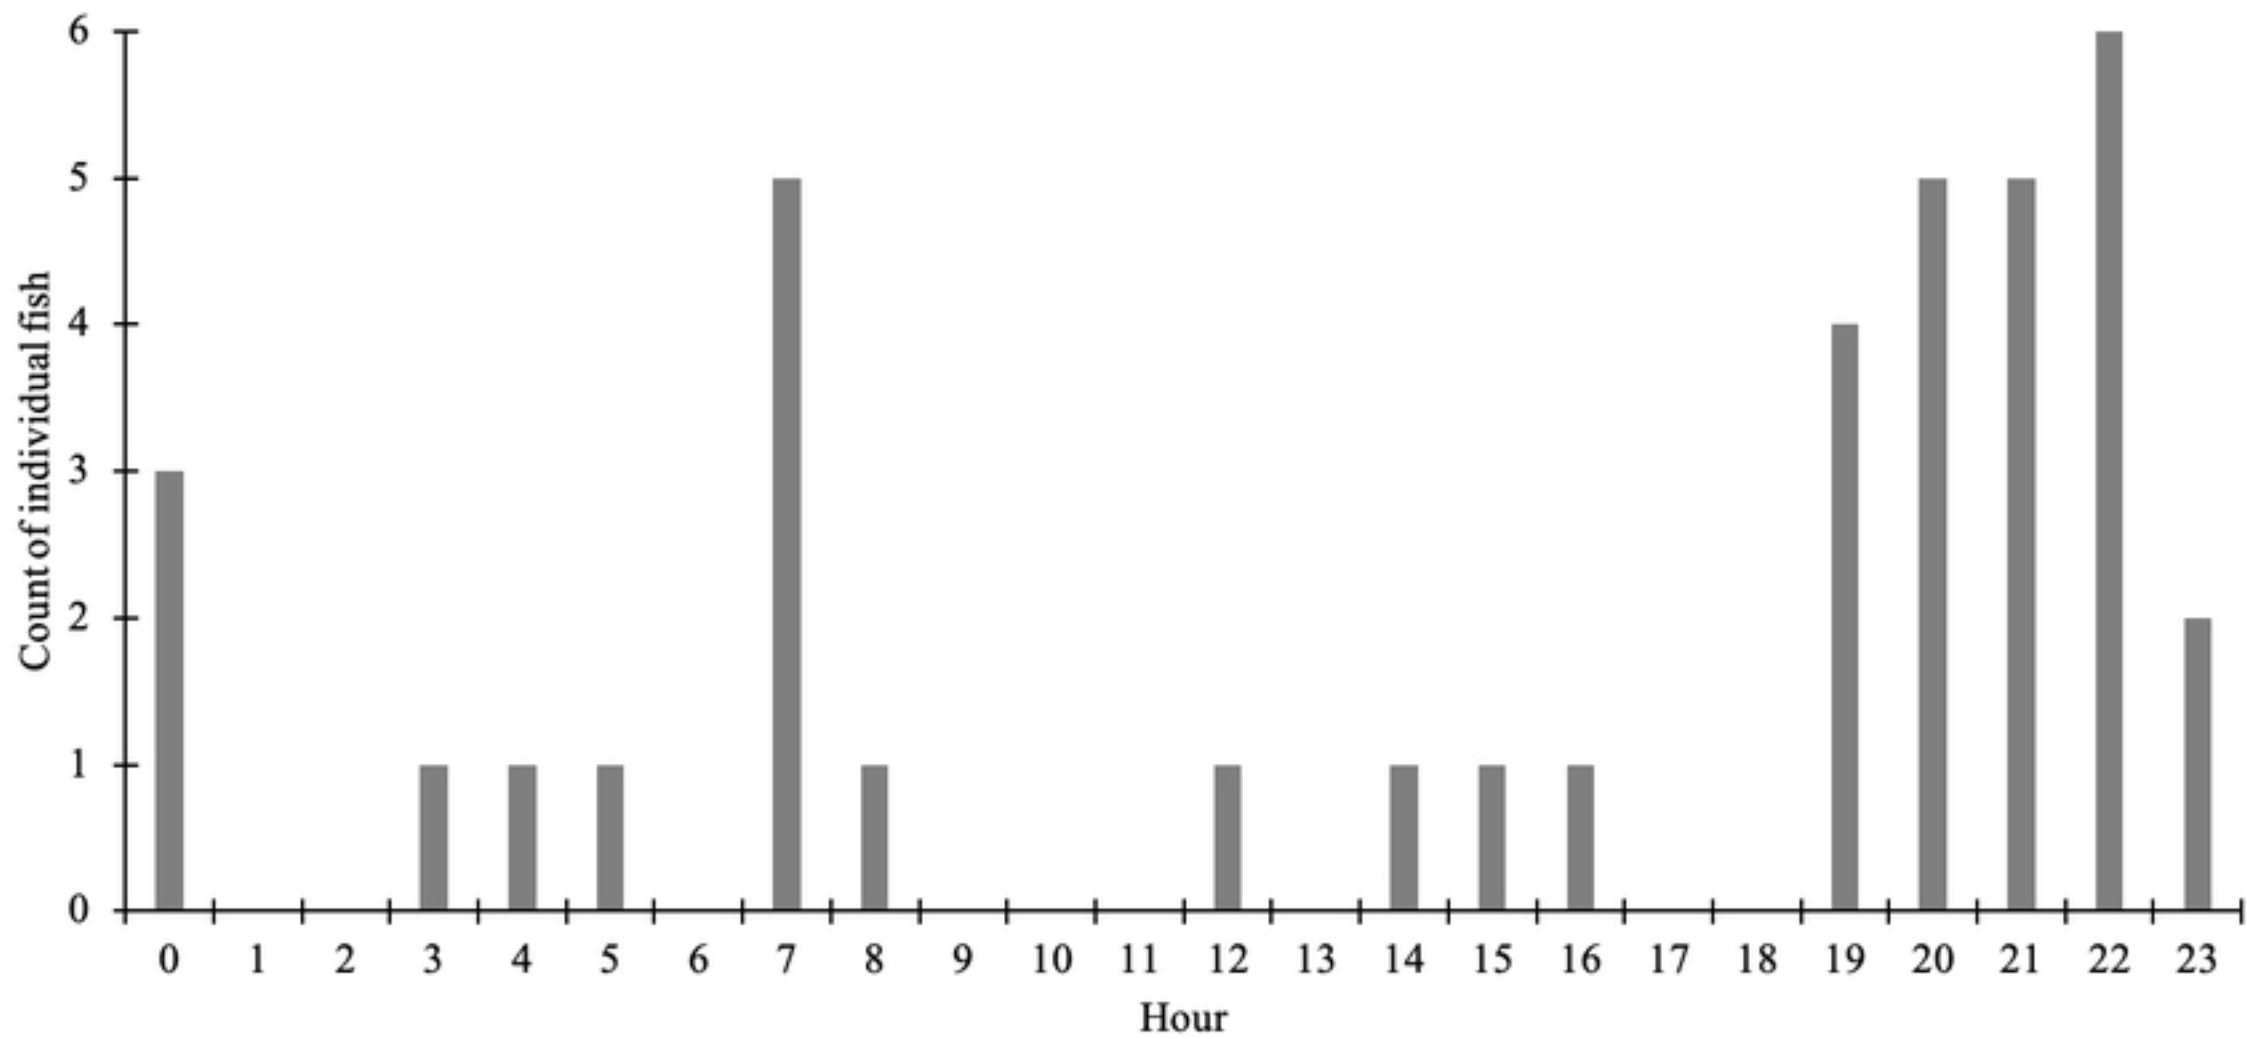



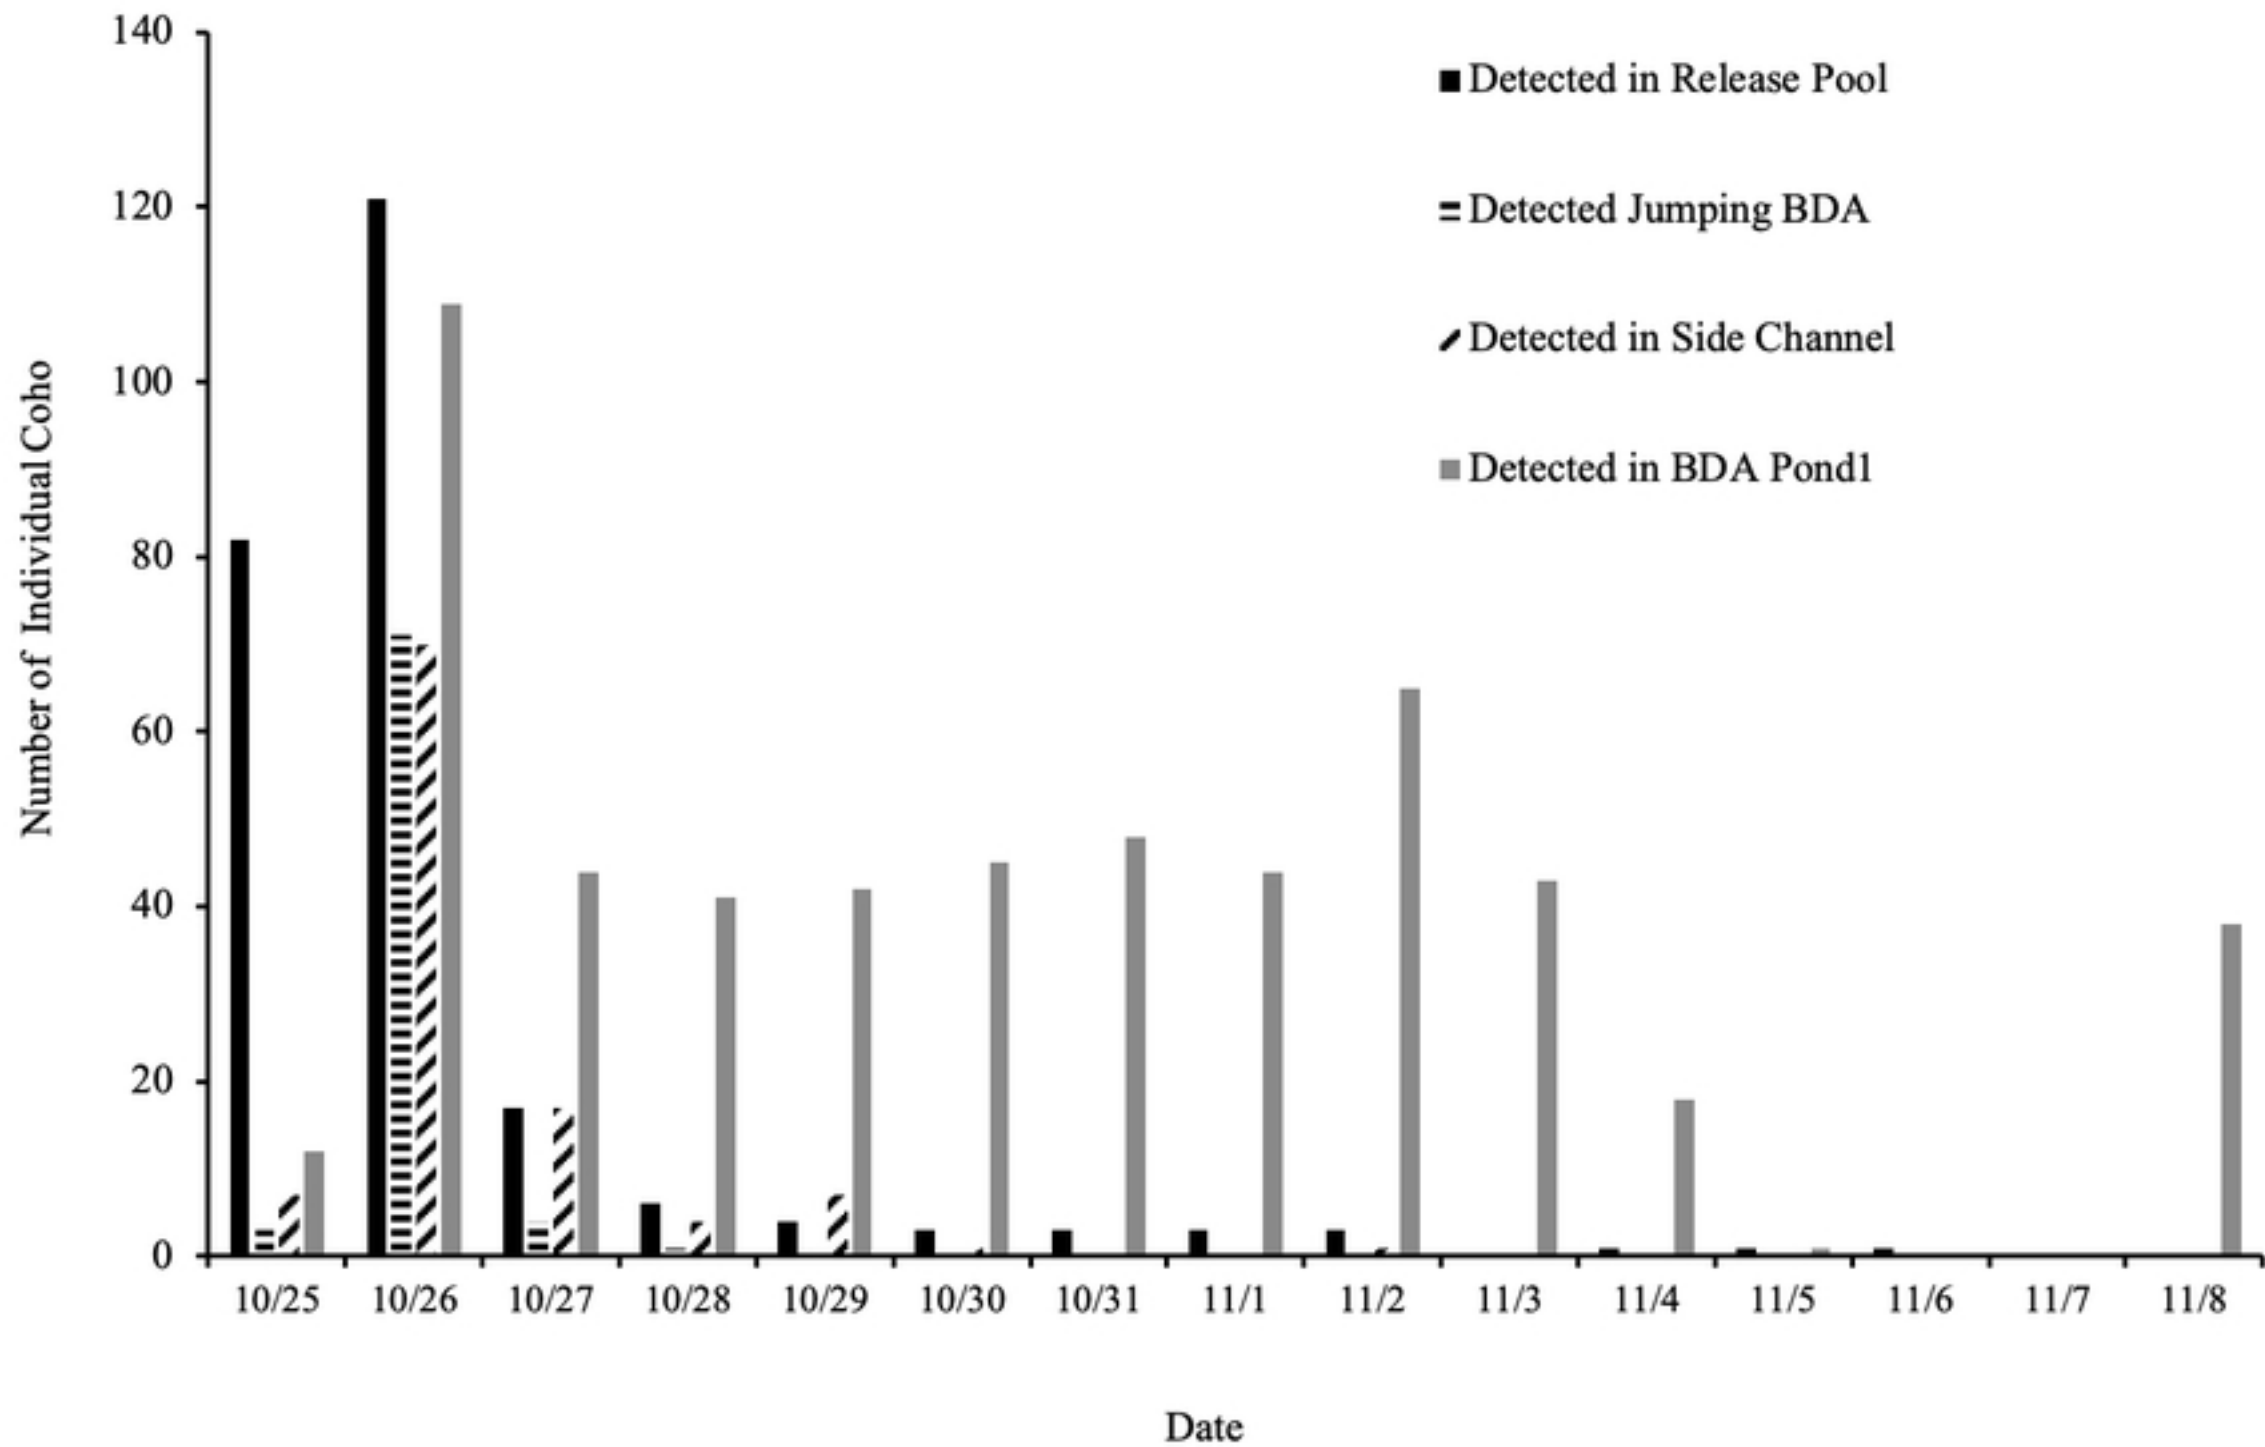

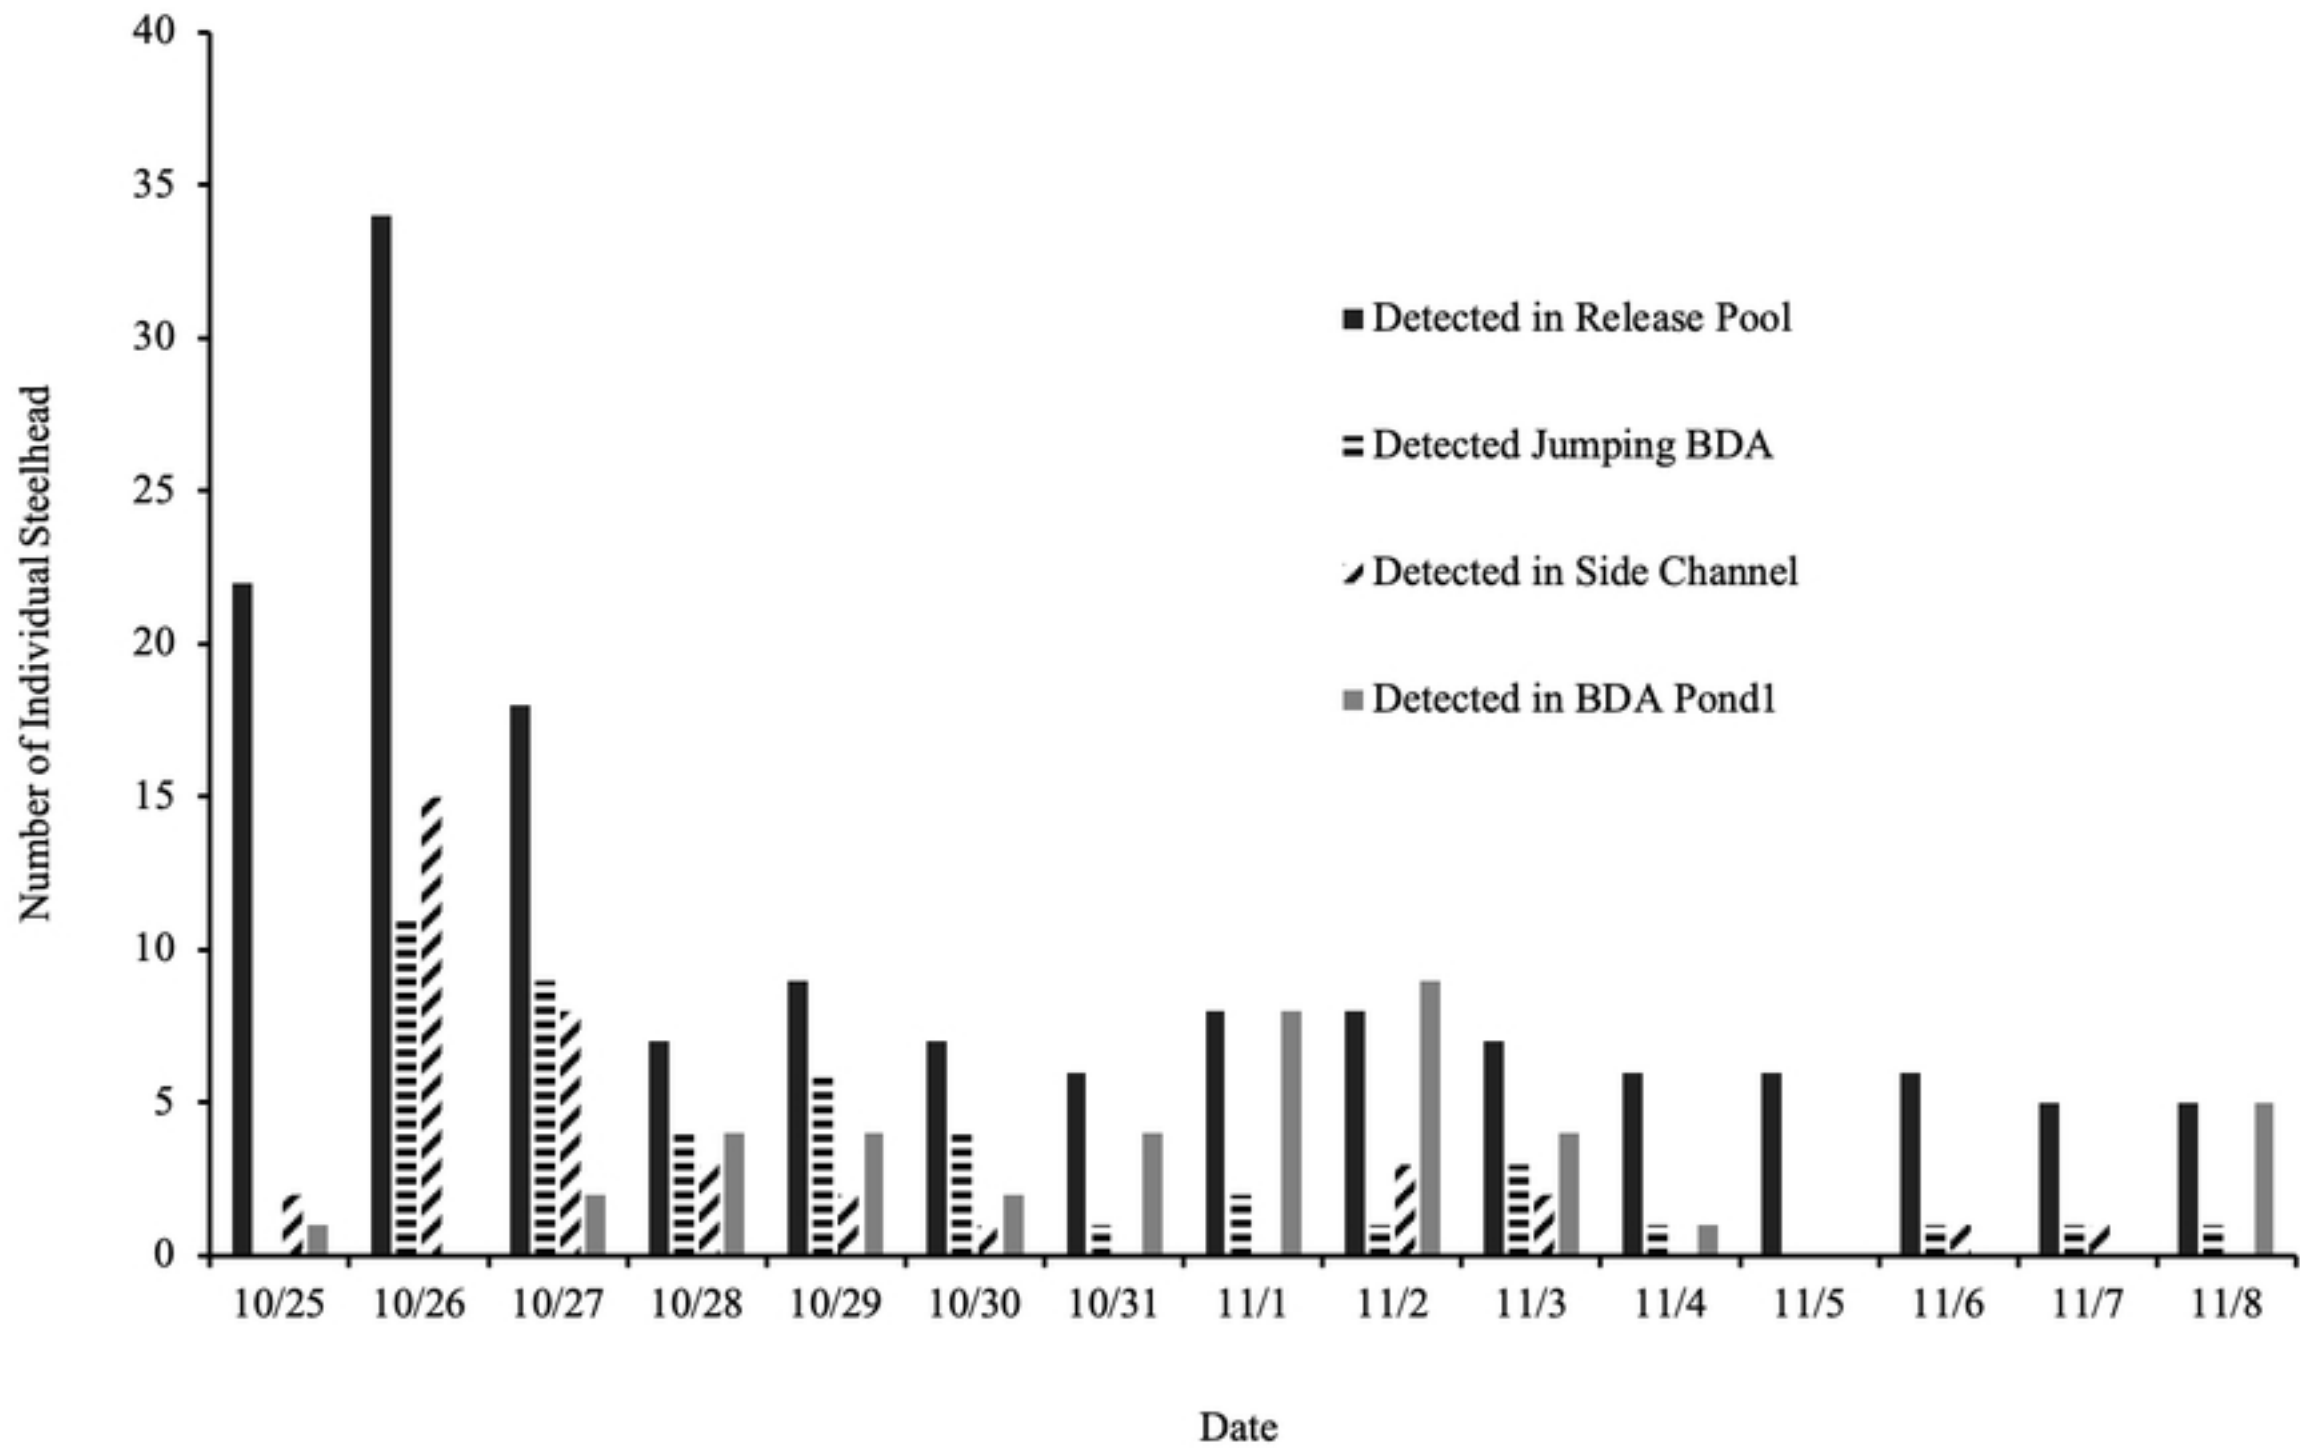

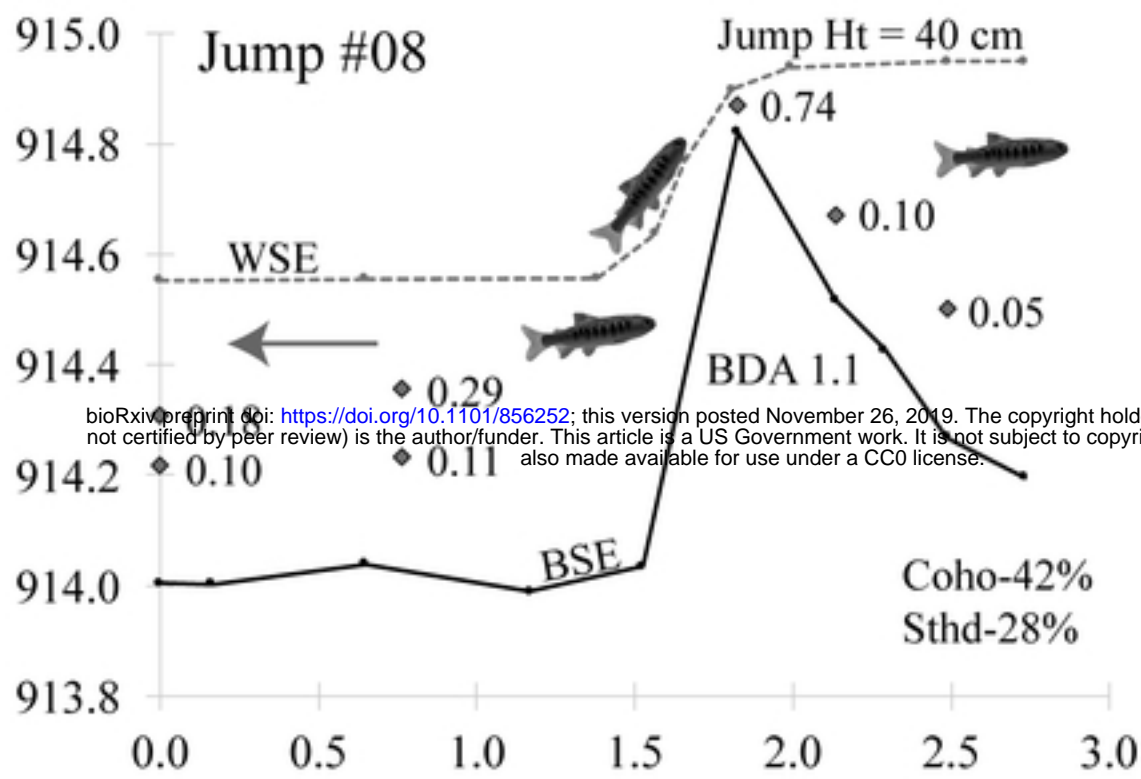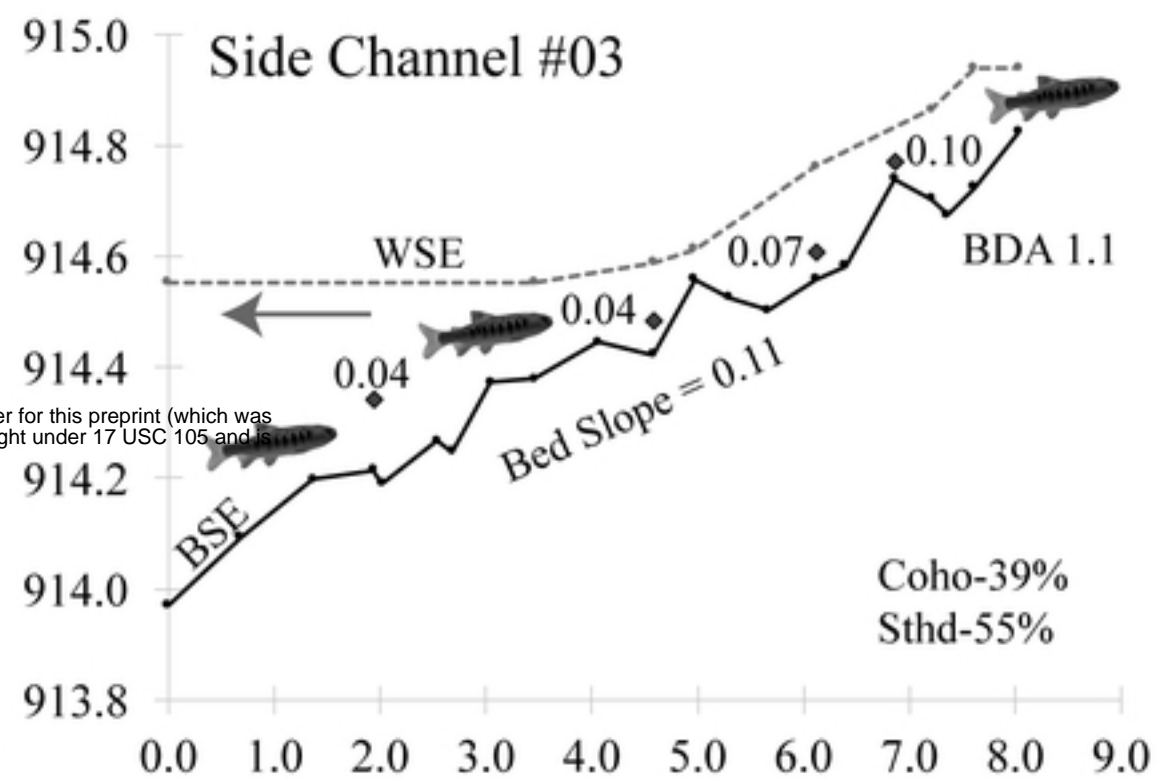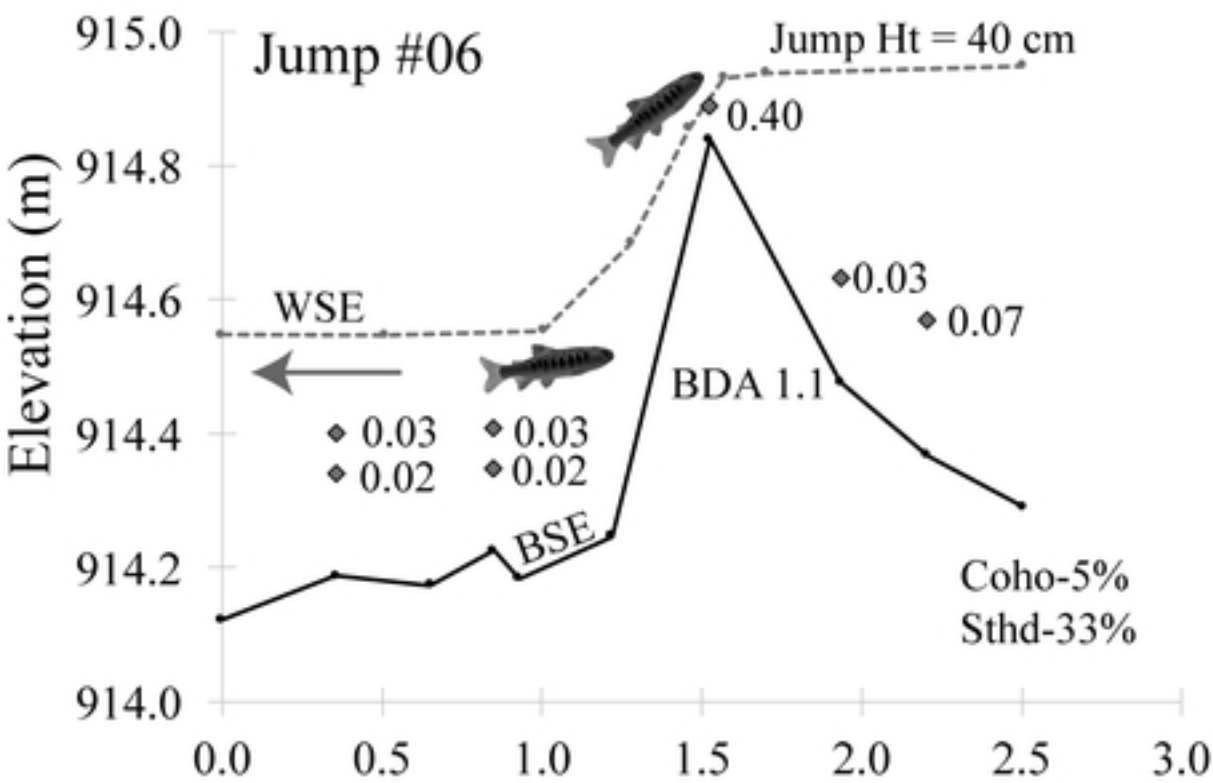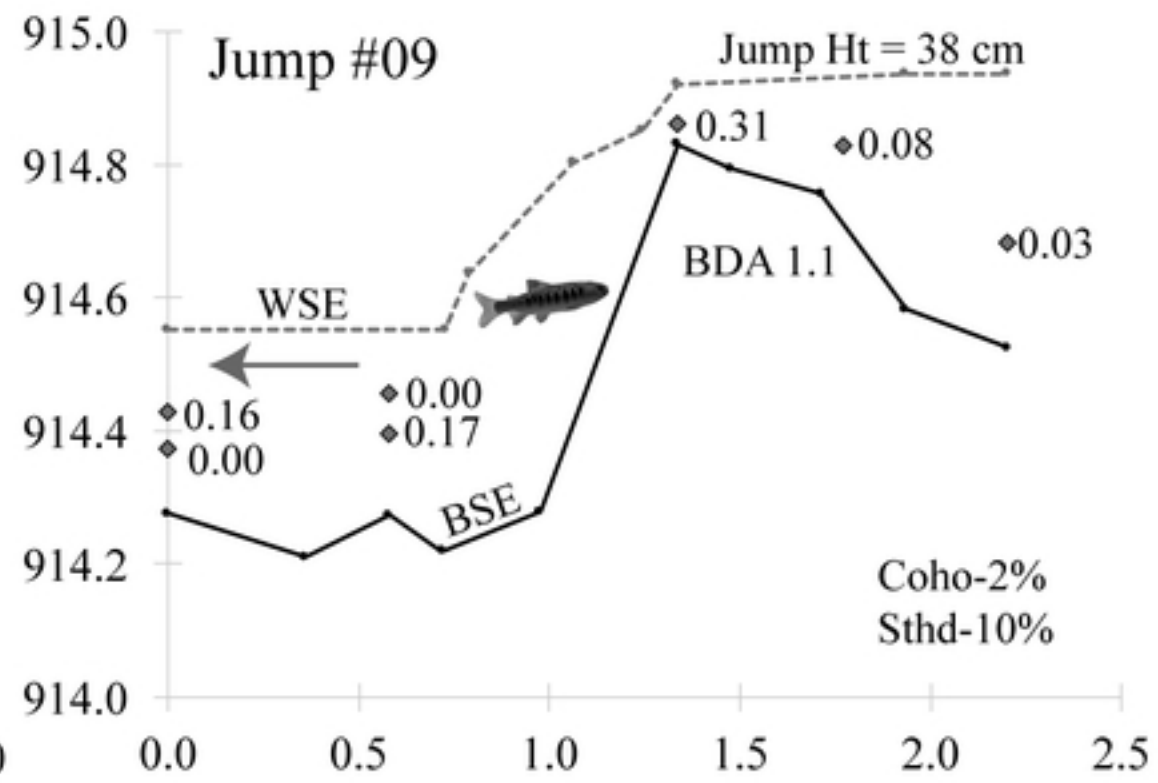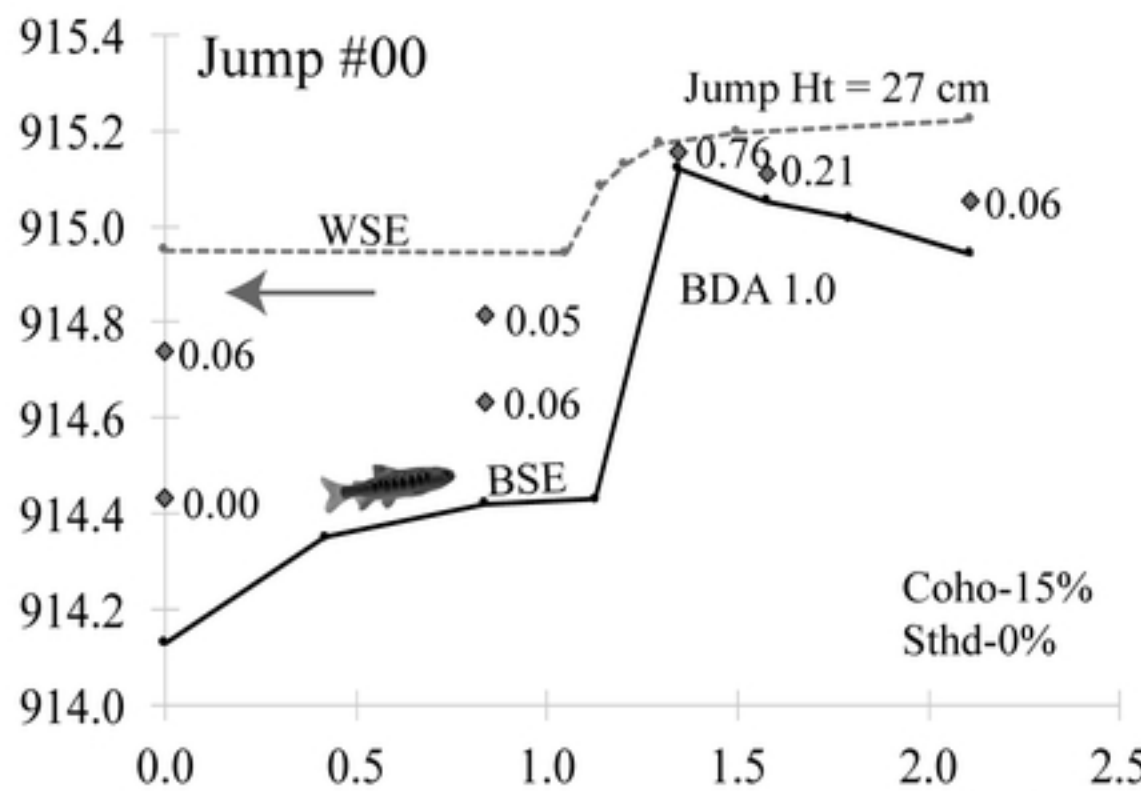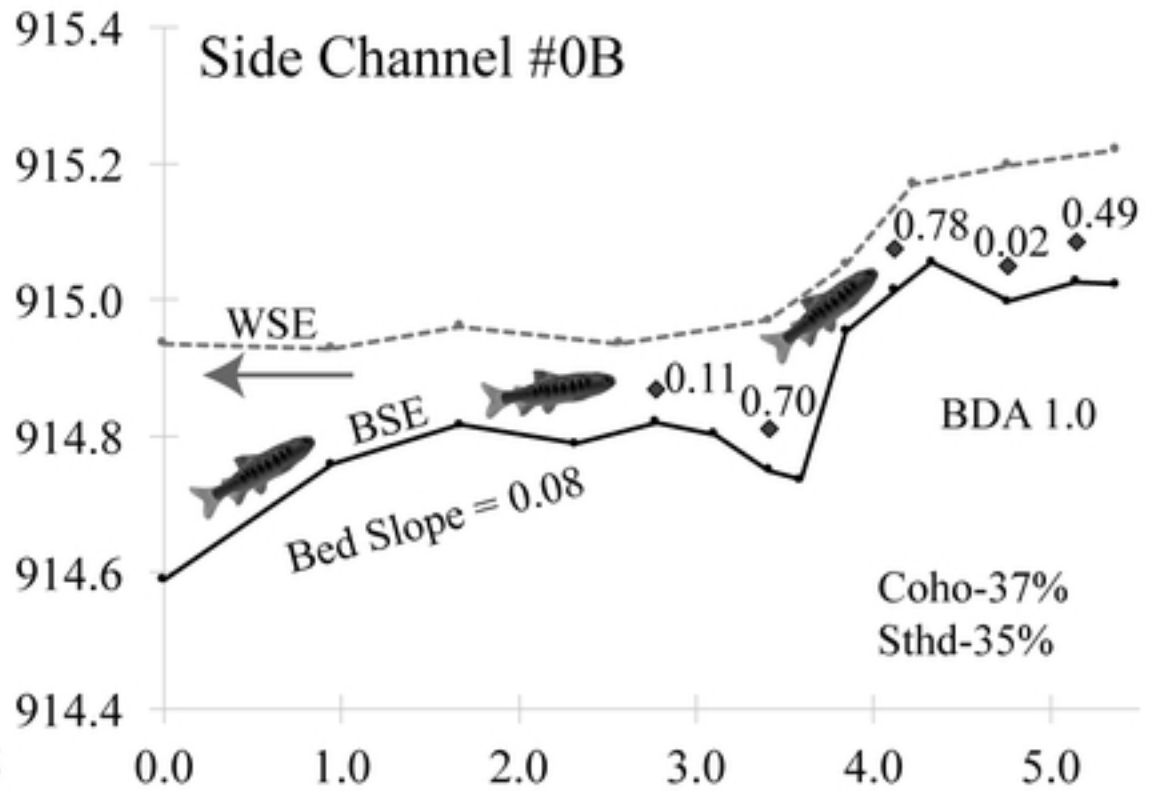

bioRxiv preprint doi: <https://doi.org/10.1101/856252>; this version posted November 26, 2019. The copyright holder for this preprint (which was not certified by peer review) is the author/funder. This article is a US Government work. It is not subject to copyright under 17 USC 105 and is also made available for use under a CC0 license.

Horizontal Distance (m)



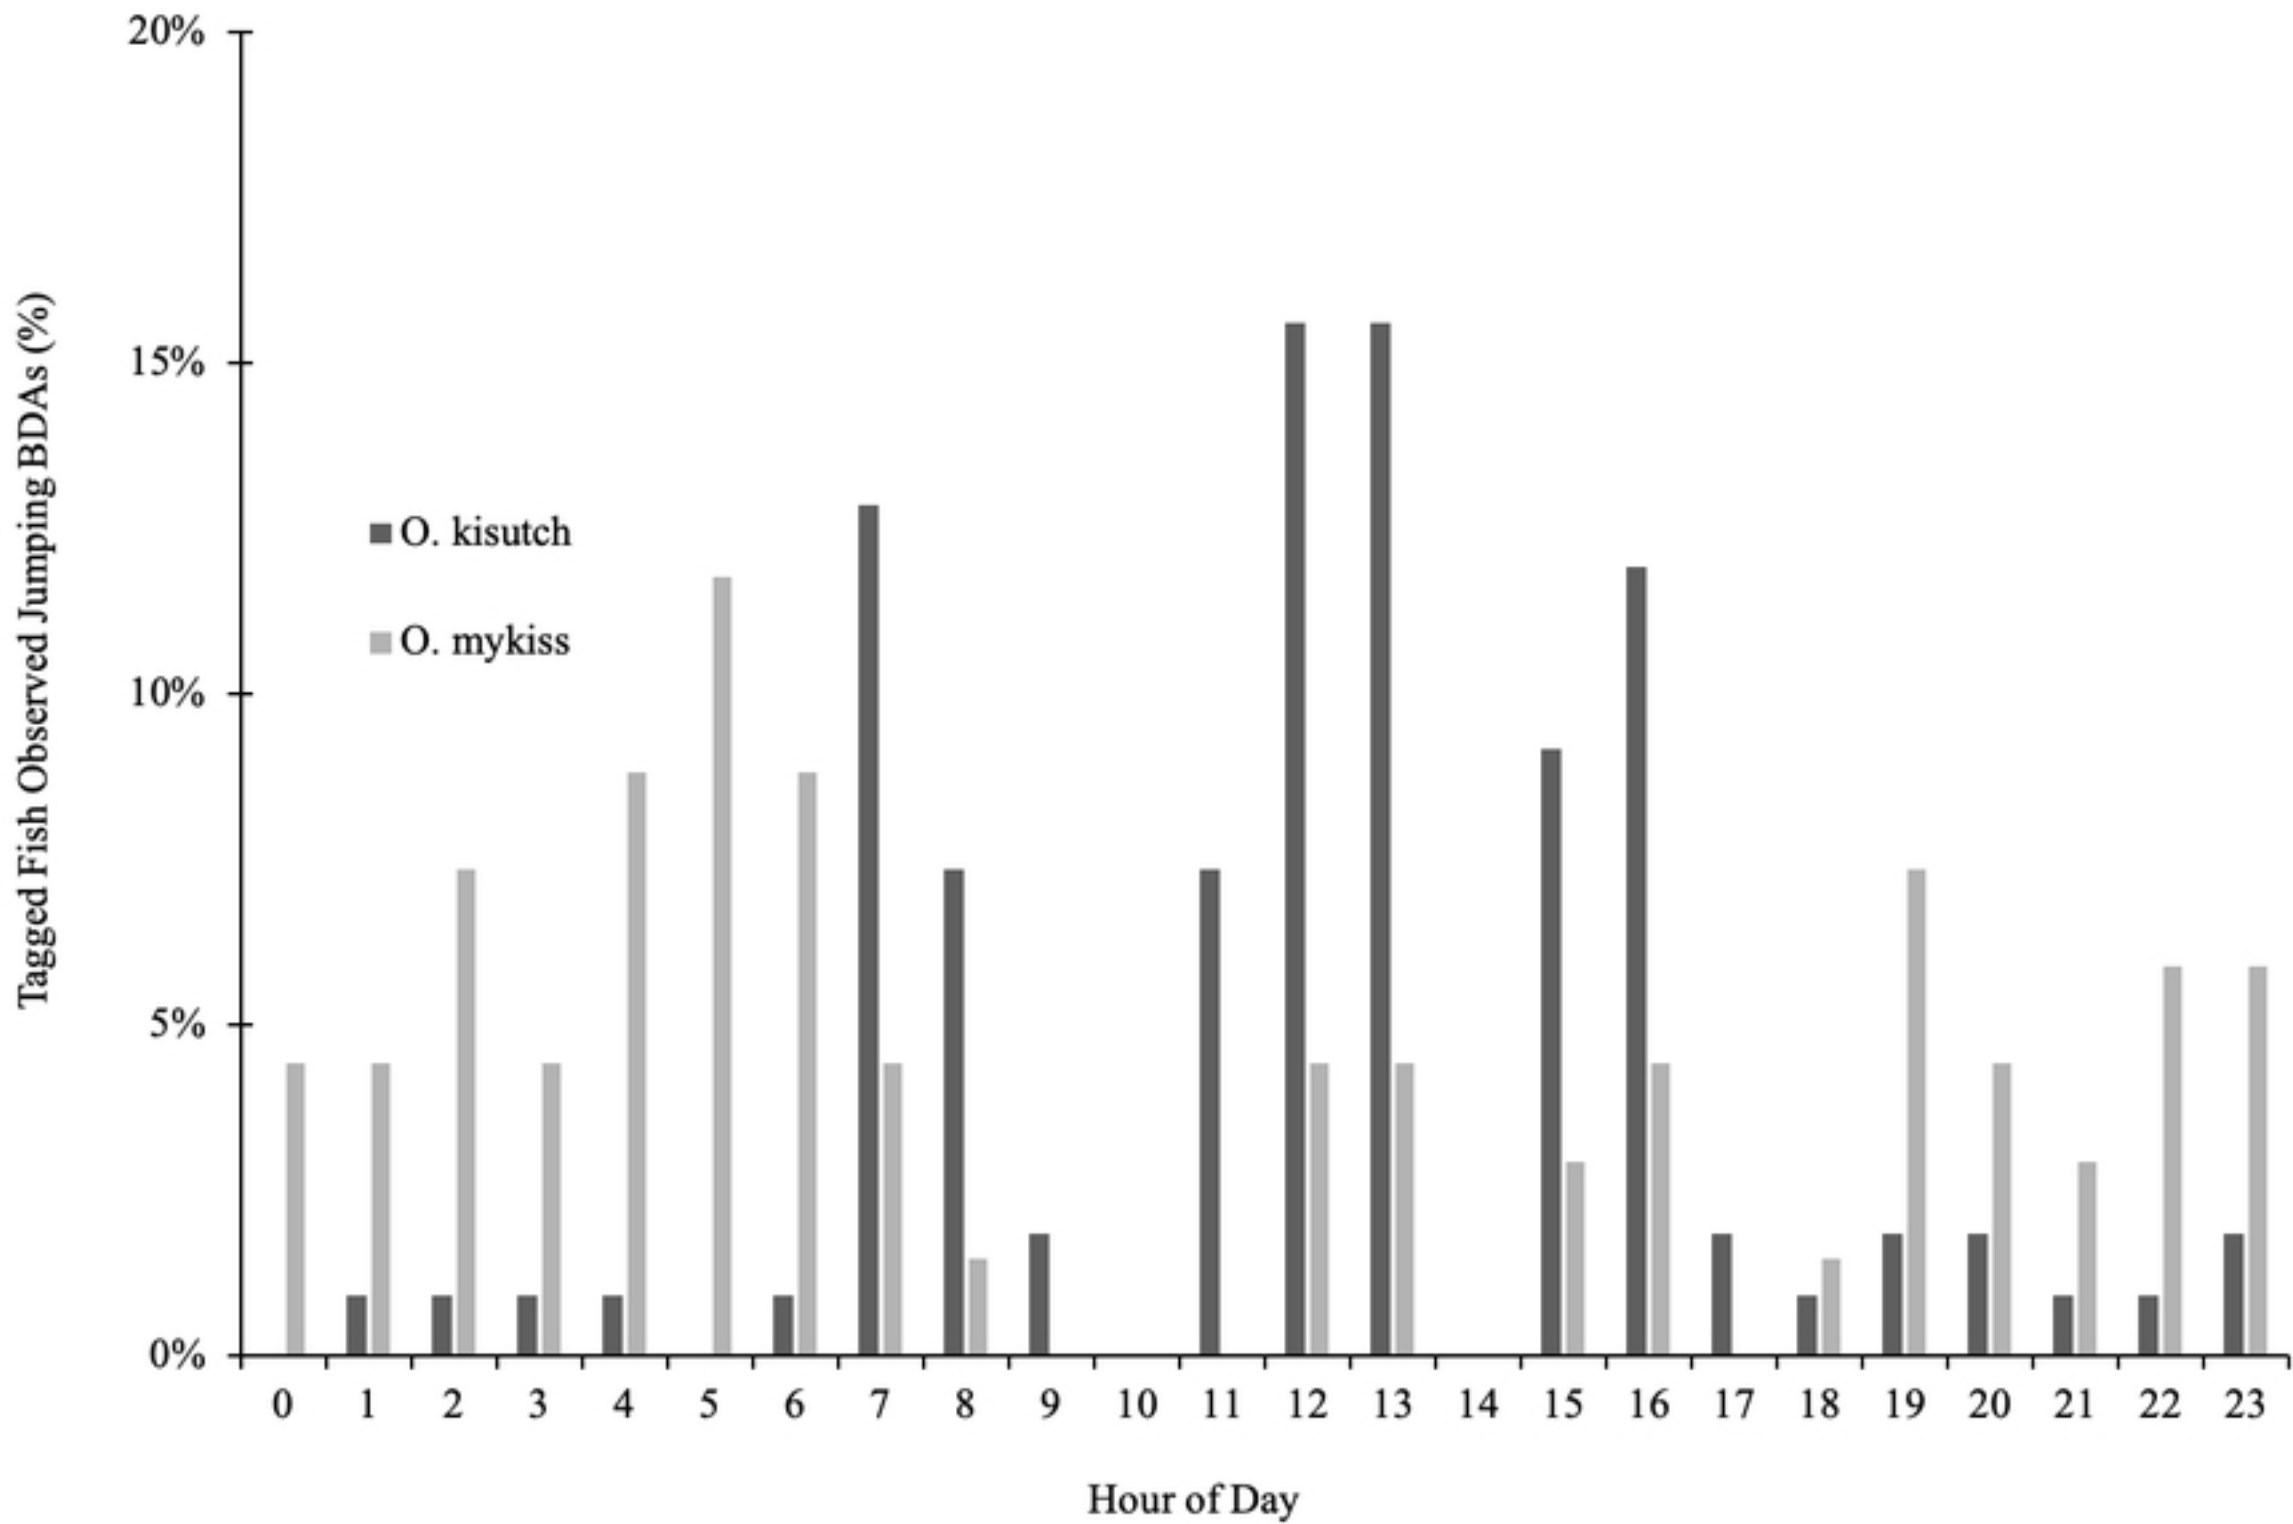

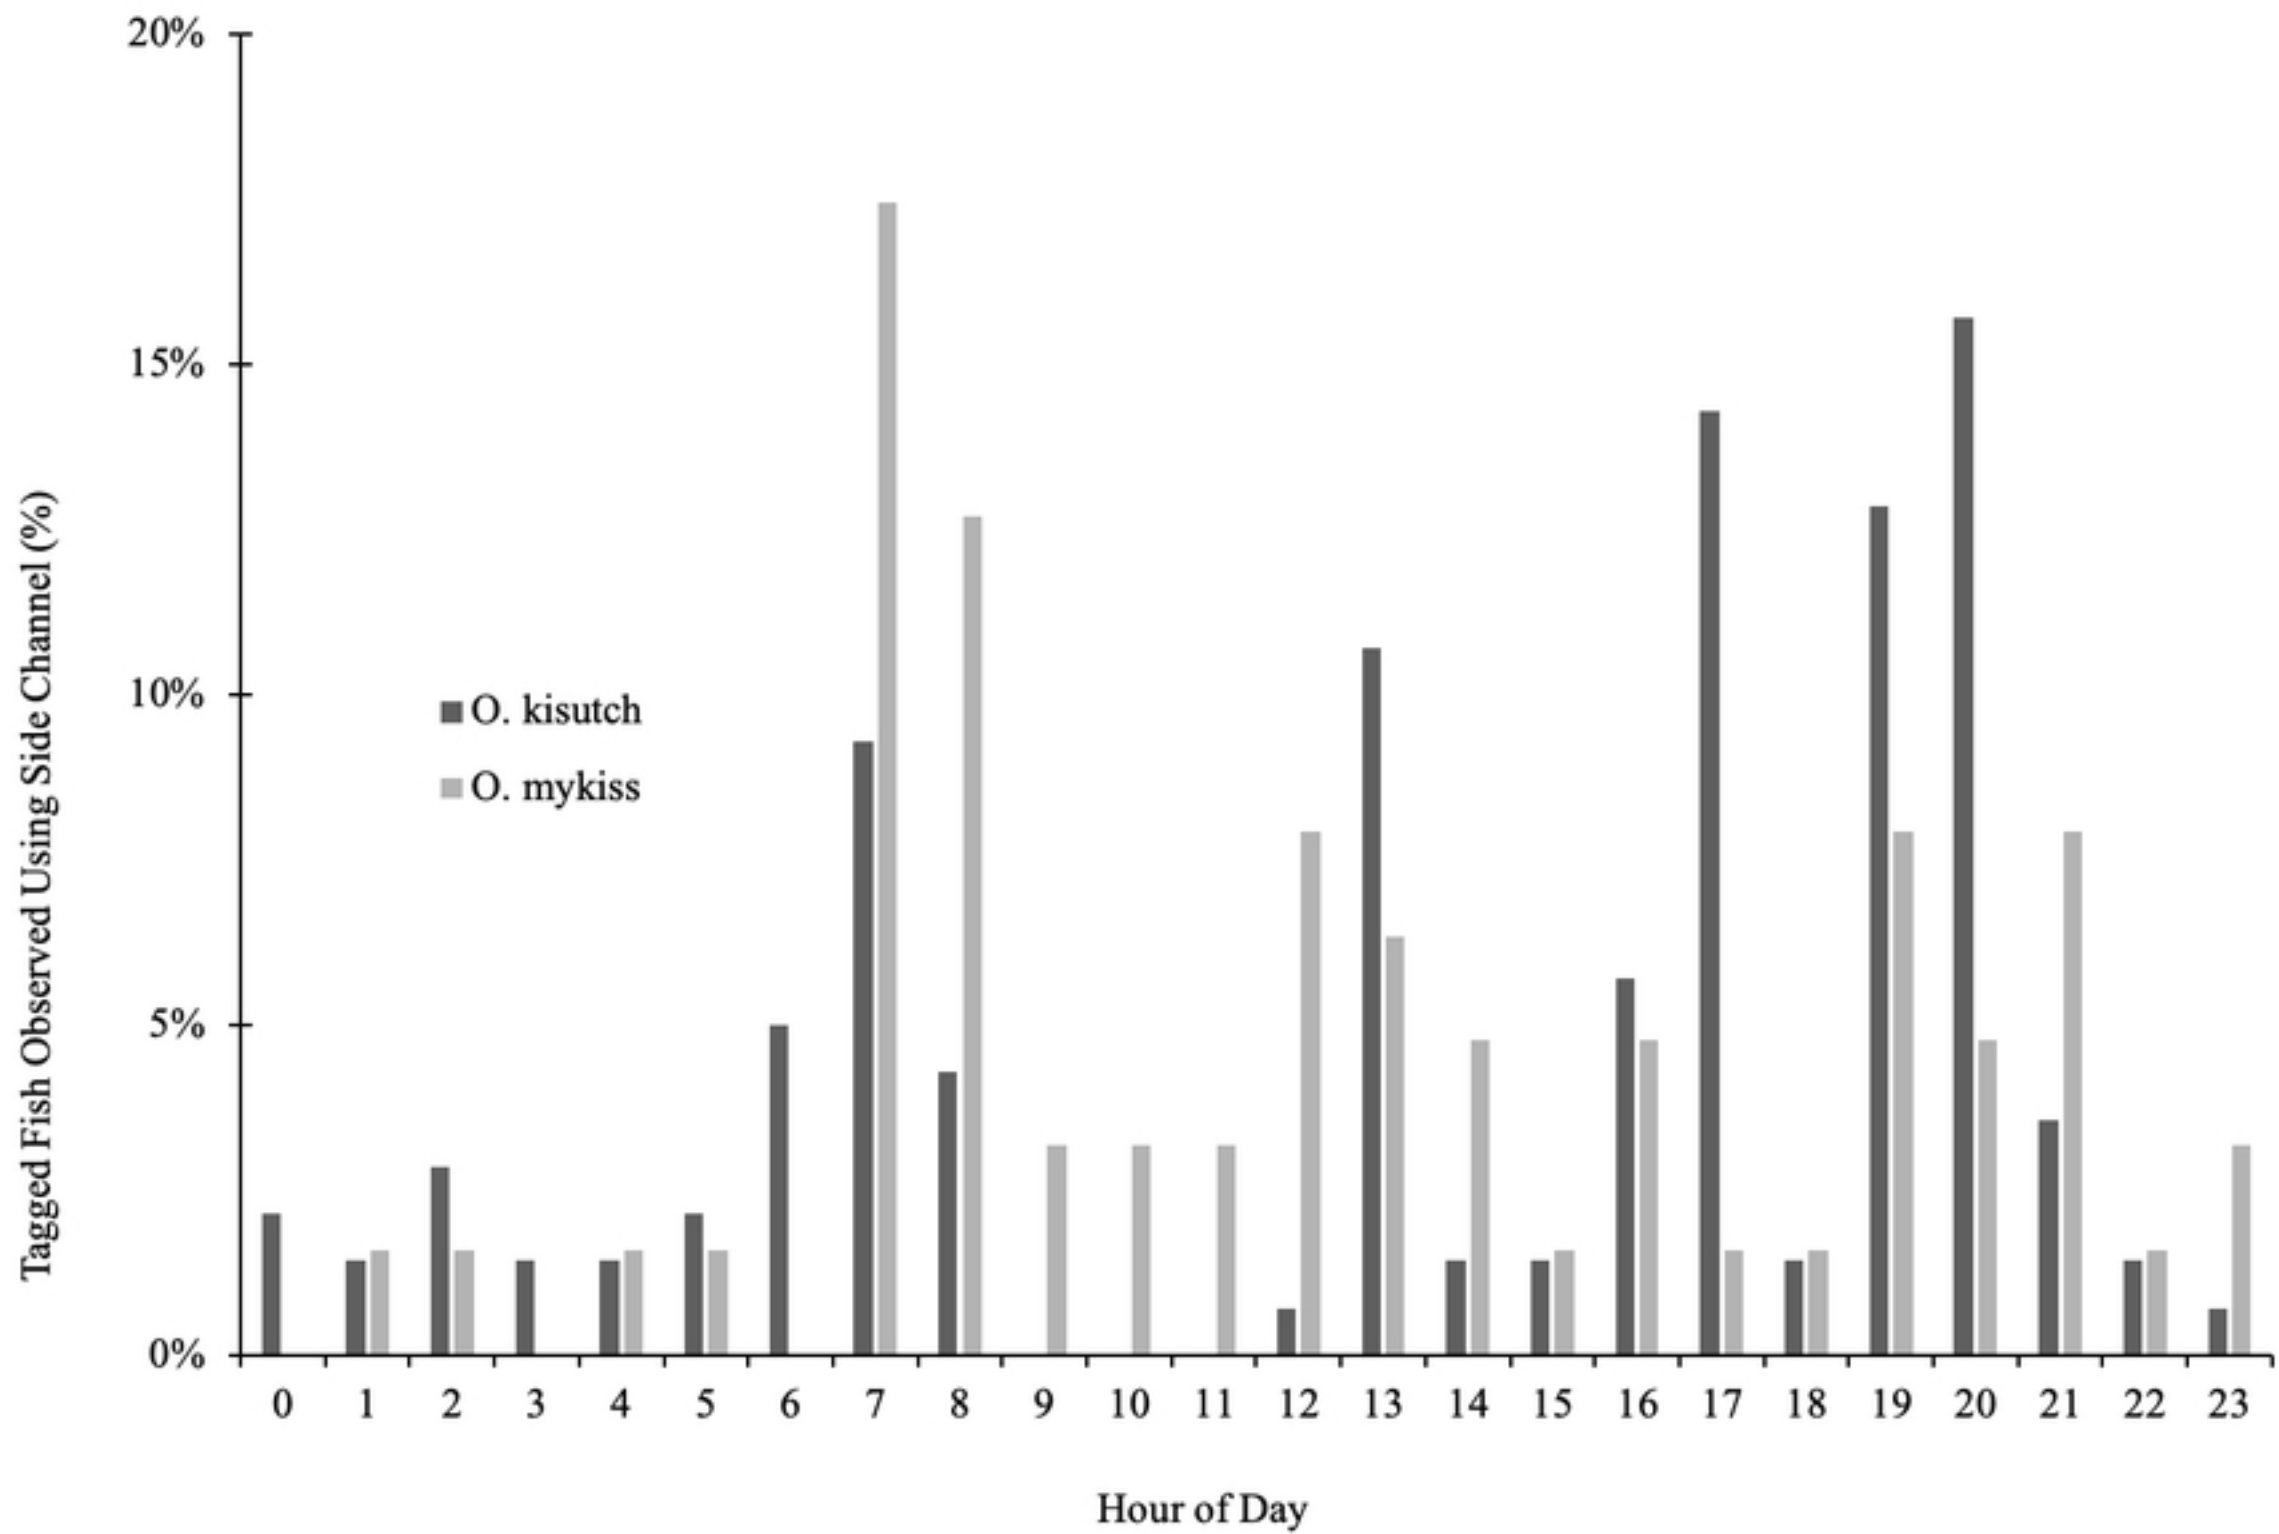

Source: https://www.biorxiv.org/content/10.1101/856252v1.full.pdf
